# Supplementary material for: The novel gene BrMYB2, located on chromosome A07, with a short intron 1 controls the purple-head trait of Chinese cabbage (Brassica rapa L.)
Source: PubMed Central journal article supplement (PMC7326913; doi:10.1038/s41438-020-0319-z), 2020-07-01
Supplement: 41438_2020_319_MOESM1_ESM.pdf [file 41438_2020_319_MOESM1_ESM.pdf]

## Supplementary Information for

The novel gene *BrMYB2*, located on chromosome A07, with a short intron 1 controls the purple-head trait of Chinese cabbage (*Brassica rapa* L.)

Author: Qiong He <sup>1,2</sup>, Junqing Wu <sup>1</sup>, Yihua Xue <sup>1</sup>, Wenbin Zhao <sup>1</sup>, Ru Li <sup>1</sup>, Lugang Zhang <sup>1,3\*</sup>

<sup>1</sup>State Key Laboratory of Crop Stress Biology for Arid Areas, College of Horticulture, Northwest A&F University, 3 Taicheng Road, Yangling 712100, Shaanxi, People's Republic of China.

<sup>2</sup>College of Life Sciences, Northwest A&F University, 3 Taicheng Road, Yangling 712100, Shaanxi, People's Republic of China.

<sup>3</sup>State Key Laboratory of Vegetable Germplasm Innovation, Tianjin, People's Republic of China.

\*Corresponding Author: Lugang Zhang

Contact e-mail of corresponding author: lugangzh@163.com

### **This PDF file includes:**

Supplementary text

Figures S1 to S14

Tables S1 to S3

**Figure S1** Electrophoresis results of *cBrMYB2* and different phenotypes of Chinese cabbage. **a** Electrophoresis results of *cBrMYB2* from purple head Chinese cabbage ‘11S91’, and its female parent ‘94S17’ and male parent ‘95T2-5’; **b-d** different white head Chinese cabbages; **e** orange head Chinese cabbage; **f-i** different purple head Chinese cabbages; **j** electrophoresis results of *cBrMYB2* from different phenotypes of Chinese cabbage. M1: DL2000 Marker.



**Figure S2** Multiple sequence alignment analysis of *BrMYBs* in *Brassica rapa*.

**a** Multiple sequence alignment analysis of *cBrMYB2* among purple head Chinese cabbage ‘11S91’ and its parents ‘94S17’ and ‘95T2-5’. ‘95T2-5’ and ‘11S91’ had consensus coding sequence (CDS). The *cBrMYB2* of ‘Chifu’ was downloaded from BRAD database.

|                |                                                                                     |     |
|----------------|-------------------------------------------------------------------------------------|-----|
| CHIFU-cBrMYB2  | ATGGAGGGTTCGTCCCAAGGGTTGAAAAAGGTGCATGGACTGCTGAAGAAGATAATCTCTTGAGGCAATGCATTGATAA     | 80  |
| 94S17-cBrmyb2  | ATGGAGGGTTCGTCCCAAGGGTTGAAAAAGGTGCATGGACTGCTGAAGAAGATAATCTCTTGAGGCAATGCATTGATAA     | 80  |
| 11S91-cBrMYB2  | ATGGAGGGTTCGTCCCAAGGGTTGAAAAAGGTGCATGGACTGCTGAAGAAGATAATCTCTTGAGGCAATGCATTGATAA     | 80  |
| 95T2-5-cBrMYB2 | ATGGAGGGTTCGTCCCAAGGGTTGAAAAAGGTGCATGGACTGCTGAAGAAGATAATCTCTTGAGGCAATGCATTGATAA     | 80  |
| Consensus      | atggaggggttcgtcccaagggttgaaaaaggtgcatggactgctgaagaagataatctcttgaggcaatgcattgataa    |     |
| CHIFU-cBrMYB2  | GTATGGAGAAGGGAATGGCACCAAGTTCCTTTAAGAGCTGGTCTAAATCGGTGCAGGAAGAGTTGTAGACTAAGATGGT     | 160 |
| 94S17-cBrmyb2  | GTATGGAGAAGGGAATGGCACCAAGTTCCTTTAAGAGCTGGTCTAAATCGGTGCAGGAAGAGTTGTAGACTAAGATGGT     | 160 |
| 11S91-cBrMYB2  | GTATGGAGAAGGGAATGGCACCAAGTTCCTTTAAGAGCTGGTCTAAATCGGTGCAGGAAGAGTTGTAGACTAAGATGGT     | 160 |
| 95T2-5-cBrMYB2 | GTATGGAGAAGGGAATGGCACCAAGTTCCTTTAAGAGCTGGTCTAAATCGGTGCAGGAAGAGTTGTAGACTAAGATGGT     | 160 |
| Consensus      | gtatggagaagggaaatggcaccaagttcctttaagagctgggtctaaatcgggtgcaggaagagttgttagactaagatggt |     |
| CHIFU-cBrMYB2  | TGAACTATTTGAAGCCAAGTATCAAGAGAGGAAAACTCAACTCCGATGAAGTTGATCTTCTTATCGCCTTCATAAGCTT     | 240 |
| 94S17-cBrmyb2  | TGAACTATTTGAAGCCAAGTATCAAGAGAGGAAAACTCAACTCCGATGAAGTTGATCTTCTTATCGCCTTCATAAGCTT     | 240 |
| 11S91-cBrMYB2  | TGAACTATTTGAAGCCAAGTATCAAGAGAGGAAAACTCAACTCCGATGAAGTTGATCTTCTTATCGCCTTCATAAGCTT     | 240 |
| 95T2-5-cBrMYB2 | TGAACTATTTGAAGCCAAGTATCAAGAGAGGAAAACTCAACTCCGATGAAGTTGATCTTCTTATCGCCTTCATAAGCTT     | 240 |
| Consensus      | tgaactatttgaagccaagtatcaagagagggaaaaactcaactccgatgaagttgatcttcttat cgccttcataagctt  |     |
| CHIFU-cBrMYB2  | TTAGGAAACAGGTGGTCTTTAATTGCTGGTAGATTACCCGGTCGGACCGCCAATGACGTCAAAAATTACTGGAACACCCA    | 320 |
| 94S17-cBrmyb2  | TTAGGAAACAGGTGGTCTTTAATTGCTGGTAGATTACCCGGTCGGACCGCCAATGACGTCAAAAATTACTGGAACACCCA    | 320 |
| 11S91-cBrMYB2  | TTAGGAAACAGGTGGTCTTTAATTGCTGGTAGATTACCCGGTCGGACCGCCAATGACGTCAAAAATTACTGGAACACCCA    | 320 |
| 95T2-5-cBrMYB2 | TTAGGAAACAGGTGGTCTTTAATTGCTGGTAGATTACCCGGTCGGACCGCCAATGACGTCAAAAATTACTGGAACACCCA    | 320 |
| Consensus      | ttaggaaacaggtggtctttaattgctggtagattacccggtcggaccgccaatgacgtcaaaaattactggaacaccca    |     |
| CHIFU-cBrMYB2  | TTTGAGTAAGAAACATGAACCGGGTTGTAAGACCCAGATGAAAAGAGAAACATTCCTTGCTCTTATACCACACCAGCCC     | 400 |
| 94S17-cBrmyb2  | TTTGAGTAAGAAACATGAACCGGGTTGTAAGACCCAGATGAAAAGAGAAACATTCCTTGCTCTTATACCACACCAGCCC     | 400 |
| 11S91-cBrMYB2  | TTTGAGTAAGAAACATGAACCGGGTTGTAAGACCCAGATGAAAAGAGAAACATTCCTTGCTCTTATACCACACCAGCCC     | 400 |
| 95T2-5-cBrMYB2 | TTTGAGTAAGAAACATGAACCGGGTTGTAAGACCCAGATGAAAAGAGAAACATTCCTTGCTCTTATACCACACCAGCCC     | 400 |
| Consensus      | tttgagtaagaaacatgaaccgggttgtaagaccagatgaaaagagaaacattccttgctcttataccacaccagccc      |     |
| CHIFU-cBrMYB2  | AAAAAATCGACGTTTTCAAACCTCGACCTCGATCCTTACCCTTAAACAGCGGCTGCAGCCATAATAATGGCATGCCAGAA    | 480 |
| 94S17-cBrmyb2  | AAAAAATCGACGTTTTCAAACCTCGACCTCGATCCTTACCCTTAAACAGCGGCTGCAGCCATAATAATGGCATGCCAGAA    | 480 |
| 11S91-cBrMYB2  | AAAAAATCGACGTTTTCAAACCTCGACCTCGATCCTTACCCTTAAACAGCGGCTGCAGCCATAATAATGGCATGCCAGAA    | 480 |
| 95T2-5-cBrMYB2 | AAAAAATCGACGTTTTCAAACCTCGACCTCGATCCTTACCCTTAAACAGCGGCTGCAGCCATAATAATGGCATGCCAGAA    | 480 |
| Consensus      | aaaaaatcgacgTTTTCAAACCTCGACCTCGATCCTTACCCTTAAACAGCGGCTGCAGCCATAATAATGGCATGCCAGAA    |     |
| CHIFU-cBrMYB2  | GCTGCATTTGTTCCCTCTATGCCTTGGACACAACGATACTAATAATGTTTCTGAAAATATAATCACATGTAACAAAGATGA   | 560 |
| 94S17-cBrmyb2  | GCTGCATTTGTTCCCTCTATGCCTTGGACACAACGATACTAATAATGTTTCTGAAAATATAATCACATGTAACAAAGATGA   | 560 |
| 11S91-cBrMYB2  | GCTGCATTTGTTCCCTCTATGCCTTGGACACAACGATACTAATAATGTTTCTGAAAATATAATCACATGTAACAAAGATGA   | 560 |
| 95T2-5-cBrMYB2 | GCTGCATTTGTTCCCTCTATGCCTTGGACACAACGATACTAATAATGTTTCTGAAAATATAATCACATGTAACAAAGATGA   | 560 |
| Consensus      | gctg cattgttcctctatgccttggacacaacgataactaataatgtttctgaaaatataatcacatgtaacaaagatga   |     |
| CHIFU-cBrMYB2  | TGATAAATCTGAGCTTGTTAGTCATTTAATGGATGGTCAGAATAGGTGGTGGGAAAGTTTGCTAGATGAGAGCCAAGATC    | 640 |
| 94S17-cBrmyb2  | TGATAAATCTGAGCTTGTTAGTCATTTAATGGATGGTCAGAATAGGTGGTGGGAAAGTTTGCTAGATGAGAGCCAAGATC    | 640 |
| 11S91-cBrMYB2  | TGATAAATCTGAGCTTGTTAGTCATTTAATGGATGGTCAGAATAGGTGGTGGGAAAGTTTGCTAGATGAGAGCCAAGATC    | 640 |
| 95T2-5-cBrMYB2 | TGATAAATCTGAGCTTGTTAGTCATTTAATGGATGGTCAGAATAGGTGGTGGGAAAGTTTGCTAGATGAGAGCCAAGATC    | 640 |
| Consensus      | tgataaatctgagcttgtagtcattttaatggatggtcagaataggtggggaaagtttgctagatgagagccaagatc      |     |
| CHIFU-cBrMYB2  | CAGCTGCGCTCTTCCAGAAACTACAGCAATAAAAAAGGGCGCAACCTCCGCGTTTGACGTTGAGCAACTTTGGAGCCTG     | 720 |
| 94S17-cBrmyb2  | CAGCTGCGCTCTTCCAGAAACTACAGCAATAAAAAAGGGCGCAACCTCCGCGTTTGACGTTGAGCAACTTTGGAGCCTG     | 720 |
| 11S91-cBrMYB2  | CAGCTGCGCTCTTCCAGAAACTACAGCAATAAAAAAGGGCGCAACCTCCGCGTTTGACGTTGAGCAACTTTGGAGCCTG     | 720 |
| 95T2-5-cBrMYB2 | CAGCTGCGCTCTTCCAGAAACTACAGCAATAAAAAAGGGCGCAACCTCCGCGTTTGACGTTGAGCAACTTTGGAGCCTG     | 720 |
| Consensus      | cagctgcgctcttccagaaactacagcaataaaaaagggcgcaacctccgcgtttgacgttgagcaactttggagcctg     |     |
| CHIFU-cBrMYB2  | TTGGATGGAGAACTGGAACCTG                                                              | 743 |
| 94S17-cBrmyb2  | TTGGATGGAGAACTGGAACCTG                                                              | 743 |
| 11S91-cBrMYB2  | TTGGATGGAGAACTGGAACCTG                                                              | 743 |
| 95T2-5-cBrMYB2 | TTGGATGGAGAACTGGAACCTG                                                              | 743 |
| Consensus      | ttggatggagaaactggaacttg                                                             |     |

## b Multiple sequence alignment analysis of *cBrMYBs* in *B. rapa*.

|                |                  |                              |                  |                 |                           |                                             |
|----------------|------------------|------------------------------|------------------|-----------------|---------------------------|---------------------------------------------|
| CHIFU-cBrMYB2  | ATGGAGGGTTCGTC   | CCCAAGGGTTGAAAAAGGTGCATGGACT | GCTGAAGAAGA      | TAATCTCTT       | GAGGCAATGCATTGATAA        | 80                                          |
| 94S17-cBrMyb2  | ATGGAGGGTTCGTC   | CCCAAGGGTTGAAAAAGGTGCATGGACT | GCTGAAGAAGA      | TAATCTCTT       | GAGGCAATGCATTGATAA        | 80                                          |
| 11S91-cBrMYB2  | ATGGAGGGTTCGTC   | CCCAAGGGTTGAAAAAGGTGCATGGACT | GCTGAAGAAGA      | TAATCTCTT       | GAGGCAATGCATTGATAA        | 80                                          |
| 95T2-5-cBrMYB2 | ATGGAGGGTTCGTC   | CCCAAGGGTTGAAAAAGGTGCATGGACT | GCTGAAGAAGA      | TAATCTCTT       | GAGGCAATGCATTGATAA        | 80                                          |
| CHIFU-cBrMYB1  | ATGGAGGATTCGTC   | CCCAAGGGTTGAAAAAGGTGCATGGACC | GCTGAAGAAGA      | CAGTCTCTT       | GAGGCAATGCATTGATAA        | 80                                          |
| CHIFU-cBrPAP1  | ATGGAGGGTTCGTC   | CCCAAGGGTTGAAAAAGGTGCATGGACT | GCTGAAGAAGA      | TAATCTCTT       | GAGGCAATGCATTGATAA        | 80                                          |
| Consensus      | atggagg ttcg c   | aagggttga                    | aaaaggtgcatggac  | gctgaagaaga a   | tctctt aggc atgcattgataa  |                                             |
|                |                  |                              |                  |                 |                           |                                             |
| CHIFU-cBrMYB2  | GTATGGAGAAGG     | CAAAATGGCACCAAGTTCCTT        | TAAAGAGCT        | GGTCTAAAT       | GGTGCAGGAAGAGT            | 160                                         |
| 94S17-cBrMyb2  | GTATGGAGAAGG     | CAAAATGGCACCAAGTTCCTT        | TAAAGAGCT        | GGTCTAAAT       | GGTGCAGGAAGAGT            | 160                                         |
| 11S91-cBrMYB2  | GTATGGAGAAGG     | CAAAATGGCACCAAGTTCCTT        | TAAAGAGCT        | GGTCTAAAT       | GGTGCAGGAAGAGT            | 160                                         |
| 95T2-5-cBrMYB2 | GTATGGAGAAGG     | CAAAATGGCACCAAGTTCCTT        | TAAAGAGCT        | GGTCTAAAT       | GGTGCAGGAAGAGT            | 160                                         |
| CHIFU-cBrMYB1  | GTATGGAGAAGG     | CAAAATGGCACCAAGTTCCTT        | TAAAGAGCT        | GGTCTAAAT       | GGTGCAGGAAGAGT            | 160                                         |
| CHIFU-cBrPAP1  | GTATGGAGAAGG     | CAAAATGGCACCAAGTTCCTT        | TAAAGAGCT        | GGTCTAAAT       | GGTGCAGGAAGAGT            | 160                                         |
| Consensus      | gtatggagaagg     | aaatggca caagttcct t         | gagc gg ct       | aat ggtg        | aggaagag tgtagactaagatggt |                                             |
|                |                  |                              |                  |                 |                           |                                             |
| CHIFU-cBrMYB2  | TGAACATTTGAAGCC  | AAGTATCAAGA                  | GAGGAAAAC        | TCAACTCC        | GATGAAGTTGATCTTCTTAT      | 240                                         |
| 94S17-cBrMyb2  | TGAACATTTGAAGCC  | AAGTATCAAGA                  | GAGGAAAAC        | TCAACTCC        | GATGAAGTTGATCTTCTTAT      | 240                                         |
| 11S91-cBrMYB2  | TGAACATTTGAAGCC  | AAGTATCAAGA                  | GAGGAAAAC        | TCAACTCC        | GATGAAGTTGATCTTCTTAT      | 240                                         |
| 95T2-5-cBrMYB2 | TGAACATTTGAAGCC  | AAGTATCAAGA                  | GAGGAAAAC        | TCAACTCC        | GATGAAGTTGATCTTCTTAT      | 240                                         |
| CHIFU-cBrMYB1  | TGAACATTTGAAGCC  | AAGTATCAAGA                  | GAGGAAAAC        | TCAACTCC        | GATGAAGTTGATCTTCTTAT      | 240                                         |
| CHIFU-cBrPAP1  | TGAACATTTGAAGCC  | AAGTATCAAGA                  | GAGGAAAAC        | TCAACTCC        | GATGAAGTTGATCTTCTTAT      | 240                                         |
| Consensus      | tgaactat         | tttgaagcc a                  | tatcaaga         | aggaaaact a     | ctc gatgaagttgatcttctt t  | cg cttcata gctt                             |
|                |                  |                              |                  |                 |                           |                                             |
| CHIFU-cBrMYB2  | TTAGGAAACAGGTGGT | CTTTAATTGCTGGTAGAT           | TACCCGGT         | GGGACCGC        | CAATGACCTCAAAAA           | 320                                         |
| 94S17-cBrMyb2  | TTAGGAAACAGGTGGT | CTTTAATTGCTGGTAGAT           | TACCCGGT         | GGGACCGC        | CAATGACCTCAAAAA           | 320                                         |
| 11S91-cBrMYB2  | TTAGGAAACAGGTGGT | CTTTAATTGCTGGTAGAT           | TACCCGGT         | GGGACCGC        | CAATGACCTCAAAAA           | 320                                         |
| 95T2-5-cBrMYB2 | TTAGGAAACAGGTGGT | CTTTAATTGCTGGTAGAT           | TACCCGGT         | GGGACCGC        | CAATGACCTCAAAAA           | 320                                         |
| CHIFU-cBrMYB1  | TTAGGAAACAGGTGGT | CTTTAATTGCTGGTAGAT           | TACCCGGT         | GGGACCGC        | CAATGACCTCAAAAA           | 320                                         |
| CHIFU-cBrPAP1  | TTAGGAAACAGGTGGT | CTTTAATTGCTGGTAGAT           | TACCCGGT         | GGGACCGC        | CAATGACCTCAAAAA           | 320                                         |
| Consensus      | taggaaacaggtggt  | cttttaattgctggtaga           | taccgggt         | ggaccgc         | aatga tcaa aa             | tactggaacacca                               |
|                |                  |                              |                  |                 |                           |                                             |
| CHIFU-cBrMYB2  | TTTGAGTAAGAAACAT | GAACCGGGTTGTAAG              | ACCAGATGAAA      | AAGAGAAACAT     | TCCCTTGCTCTTATACCAC       | 400                                         |
| 94S17-cBrMyb2  | TTTGAGTAAGAAACAT | GAACCGGGTTGTAAG              | ACCAGATGAAA      | AAGAGAAACAT     | TCCCTTGCTCTTATACCAC       | 400                                         |
| 11S91-cBrMYB2  | TTTGAGTAAGAAACAT | GAACCGGGTTGTAAG              | ACCAGATGAAA      | AAGAGAAACAT     | TCCCTTGCTCTTATACCAC       | 400                                         |
| 95T2-5-cBrMYB2 | TTTGAGTAAGAAACAT | GAACCGGGTTGTAAG              | ACCAGATGAAA      | AAGAGAAACAT     | TCCCTTGCTCTTATACCAC       | 400                                         |
| CHIFU-cBrMYB1  | TTTGAGTAAGAAACAT | GAACCGGGTTGTAAG              | ACCAGATGAAA      | AAGAGAAACAT     | TCCCTTGCTCTTATACCAC       | 400                                         |
| CHIFU-cBrPAP1  | TTTGAGTAAGAAACAT | GAACCGGGTTGTAAG              | ACCAGATGAAA      | AAGAGAAACAT     | TCCCTTGCTCTTATACCAC       | 400                                         |
| Consensus      | t t              | tgag aagaaacatgaacc          | g tgtaa          | acc agatga      | aagagaac tt c t           | ctctt acc acc gccc                          |
|                |                  |                              |                  |                 |                           |                                             |
| CHIFU-cBrMYB2  | AAAAAATCGACGTTT  | TCAAACCTCGACCTCGAT           | CTTCAAC          | CGTTAACAG       | GGCTGCAGCCATAA            | 480                                         |
| 94S17-cBrMyb2  | AAAAAATCGACGTTT  | TCAAACCTCGACCTCGAT           | CTTCAAC          | CGTTAACAG       | GGCTGCAGCCATAA            | 480                                         |
| 11S91-cBrMYB2  | AAAAAATCGACGTTT  | TCAAACCTCGACCTCGAT           | CTTCAAC          | CGTTAACAG       | GGCTGCAGCCATAA            | 480                                         |
| 95T2-5-cBrMYB2 | AAAAAATCGACGTTT  | TCAAACCTCGACCTCGAT           | CTTCAAC          | CGTTAACAG       | GGCTGCAGCCATAA            | 480                                         |
| CHIFU-cBrMYB1  | AAAAAATCGACGTTT  | TCAAACCTCGACCTCGAT           | CTTCAAC          | CGTTAACAG       | GGCTGCAGCCATAA            | 480                                         |
| CHIFU-cBrPAP1  | AAAAAATCGACGTTT  | TCAAACCTCGACCTCGAT           | CTTCAAC          | CGTTAACAG       | GGCTGCAGCCATAA            | 480                                         |
| Consensus      | aaaaaa           | ga gtt                       | tcaaacctcgacctga | cttcac          | gntaaaca                  | ggctgcagccat atggc gccaa aa                 |
|                |                  |                              |                  |                 |                           |                                             |
| CHIFU-cBrMYB2  | GCTGACATTTGCTCCT | CATGCTTGGACACAAC             | GATTAATAA        | TGTTCTGAAAATATA | ATC                       | 560                                         |
| 94S17-cBrMyb2  | GCTGACATTTGCTCCT | CATGCTTGGACACAAC             | GATTAATAA        | TGTTCTGAAAATATA | ATC                       | 560                                         |
| 11S91-cBrMYB2  | GCTGACATTTGCTCCT | CATGCTTGGACACAAC             | GATTAATAA        | TGTTCTGAAAATATA | ATC                       | 560                                         |
| 95T2-5-cBrMYB2 | GCTGACATTTGCTCCT | CATGCTTGGACACAAC             | GATTAATAA        | TGTTCTGAAAATATA | ATC                       | 560                                         |
| CHIFU-cBrMYB1  | GCTGACATTTGCTCCT | CATGCTTGGACACAAC             | GATTAATAA        | TGTTCTGAAAATATA | ATC                       | 560                                         |
| CHIFU-cBrPAP1  | GCTGACATTTGCTCCT | CATGCTTGGACACAAC             | GATTAATAA        | TGTTCTGAAAATATA | ATC                       | 560                                         |
| Consensus      | g tg c tt        | ttcctc at                    | ccttggga         | aac a a         | taataatgt t               | tgaaaata at acat taa aaag tg                |
|                |                  |                              |                  |                 |                           |                                             |
| CHIFU-cBrMYB2  | TGATAAATCTGACCT  | TGTTAGTCAATTA                | TGATGGATGGT      | CAGAA           | TAGTGGTGGGAAAG            | 640                                         |
| 94S17-cBrMyb2  | TGATAAATCTGACCT  | TGTTAGTCAATTA                | TGATGGATGGT      | CAGAA           | TAGTGGTGGGAAAG            | 640                                         |
| 11S91-cBrMYB2  | TGATAAATCTGACCT  | TGTTAGTCAATTA                | TGATGGATGGT      | CAGAA           | TAGTGGTGGGAAAG            | 640                                         |
| 95T2-5-cBrMYB2 | TGATAAATCTGACCT  | TGTTAGTCAATTA                | TGATGGATGGT      | CAGAA           | TAGTGGTGGGAAAG            | 640                                         |
| CHIFU-cBrMYB1  | TGATAAATCTGACCT  | TGTTAGTCAATTA                | TGATGGATGGT      | CAGAA           | TAGTGGTGGGAAAG            | 640                                         |
| CHIFU-cBrPAP1  | TGATAAATCTGACCT  | TGTTAGTCAATTA                | TGATGGATGGT      | CAGAA           | TAGTGGTGGGAAAG            | 640                                         |
| Consensus      | ga aa t          | tga ct                       | ta t             | at              | taataatggtg               | agaa a gttggtg a agtttgcctaga gagagc aa a c |
|                |                  |                              |                  |                 |                           |                                             |
| CHIFU-cBrMYB2  | CAGCTGCGCTCTT    | TCCAGAACTACAG                | CAATAAAAAAG      | GGCGCAACCT      | CCGCGTTGACGTTGAGCA        | 720                                         |
| 94S17-cBrMyb2  | CAGCTGCGCTCTT    | TCCAGAACTACAG                | CAATAAAAAAG      | GGCGCAACCT      | CCGCGTTGACGTTGAGCA        | 720                                         |
| 11S91-cBrMYB2  | CAGCTGCGCTCTT    | TCCAGAACTACAG                | CAATAAAAAAG      | GGCGCAACCT      | CCGCGTTGACGTTGAGCA        | 720                                         |
| 95T2-5-cBrMYB2 | CAGCTGCGCTCTT    | TCCAGAACTACAG                | CAATAAAAAAG      | GGCGCAACCT      | CCGCGTTGACGTTGAGCA        | 720                                         |
| CHIFU-cBrMYB1  | CAGCTGCGCTCTT    | TCCAGAACTACAG                | CAATAAAAAAG      | GGCGCAACCT      | CCGCGTTGACGTTGAGCA        | 720                                         |
| CHIFU-cBrPAP1  | CAGCTGCGCTCTT    | TCCAGAACTACAG                | CAATAAAAAAG      | GGCGCAACCT      | CCGCGTTGACGTTGAGCA        | 720                                         |
| Consensus      | c g g g t        | ttcca aa                     | tac g a          | aaaaag          | gcaacct                   | gcgtttgacggtgagcaactttgga gctg              |
|                |                  |                              |                  |                 |                           |                                             |
| CHIFU-cBrMYB2  | TTGGATGGAGAAAC   | ..TGGAACTTGA...              |                  |                 |                           | 744                                         |
| 94S17-cBrMyb2  | TTGGATGGAGAAAC   | ..TGGAACTTGA...              |                  |                 |                           | 744                                         |
| 11S91-cBrMYB2  | TTGGATGGAGAAAC   | ..TGGAACTTGA...              |                  |                 |                           | 744                                         |
| 95T2-5-cBrMYB2 | TTGGATGGAGAAAC   | ..TGGAACTTGA...              |                  |                 |                           | 744                                         |
| CHIFU-cBrMYB1  | TTGGATGGAGAGACT  | ..TGGAACTTGA...              |                  |                 |                           | 749                                         |
| CHIFU-cBrPAP1  | TTGGATGGAGAGACT  | ..TGGAACTTGA...              |                  |                 |                           | 749                                         |
| Consensus      | tt gatgg ga ac   | t gaacttga                   |                  |                 |                           |                                             |

**c** Multiple sequence alignment analysis of *cBrMYB2* from different phenotypes of Chinese cabbage. The *cBrMYB2* of ‘Chifu’ was downloaded from BRAD database.

|                 |                                                                                     |     |
|-----------------|-------------------------------------------------------------------------------------|-----|
| 11S91-cBrMYB2   | ATGGAGGGTTCGTCCCAAGGGTTGAAAAAAGGTGCATGGACIGCTGAAGAAGATAAATCTCTTGAGGCAATGCATTGATAA   | 80  |
| 14S838-cBrMYB2  | ATGGAGGGTTCGTCCCAAGGGTTGAAAAAAGGTGCATGGACIGCTGAAGAAGATAAATCTCTTGAGGCAATGCATTGATAA   | 80  |
| 95T2-5-cBrMYB2  | ATGGAGGGTTCGTCCCAAGGGTTGAAAAAAGGTGCATGGACIGCTGAAGAAGATAAATCTCTTGAGGCAATGCATTGATAA   | 80  |
| Z33-cBrMYB2     | ATGGAGGGTTCGTCCCAAGGGTTGAAAAAAGGTGCATGGACIGCTGAAGAAGATAAATCTCTTGAGGCAATGCATTGATAA   | 80  |
| Z190-cBrMYB2    | ATGGAGGGTTCGTCCCAAGGGTTGAAAAAAGGTGCATGGACIGCTGAAGAAGATAAATCTCTTGAGGCAATGCATTGATAA   | 80  |
| Z240-cBrMYB2    | ATGGAGGGTTCGTCCCAAGGGTTGAAAAAAGGTGCATGGACIGCTGAAGAAGATAAATCTCTTGAGGCAATGCATTGATAA   | 80  |
| Chifu-cBrMYB2   | ATGGAGGGTTCGTCCCAAGGGTTGAAAAAAGGTGCATGGACIGCTGAAGAAGATAAATCTCTTGAGGCAATGCATTGATAA   | 80  |
| 13S93-cBrmyb2   | ATGGAGGGTTCGTCCCAAGGGTTGAAAAAAGGTGCATGGACIGCTGAAGAAGATAAATCTCTTGAGGCAATGCATTGATAA   | 80  |
| 13S1147-cBrmyb2 | ATGGAGGGTTCGTCCCAAGGGTTGAAAAAAGGTGCATGGACIGCTGAAGAAGATAAATCTCTTGAGGCAATGCATTGATAA   | 80  |
| 15S1080-cBrmyb2 | ATGGAGGGTTCGTCCCAAGGGTTGAAAAAAGGTGCATGGACIGCTGAAGAAGATAAATCTCTTGAGGCAATGCATTGATAA   | 80  |
| 15S1084-cBrmyb2 | ATGGAGGGTTCGTCCCAAGGGTTGAAAAAAGGTGCATGGACIGCTGAAGAAGATAAATCTCTTGAGGCAATGCATTGATAA   | 80  |
| 94S17-cBrmyb2   | ATGGAGGGTTCGTCCCAAGGGTTGAAAAAAGGTGCATGGACIGCTGAAGAAGATAAATCTCTTGAGGCAATGCATTGATAA   | 80  |
| Consensus       | atggaggggttcgtcccaagggttgaaaaaaggtgcatggactgctgaagaagataaattctcttgaggcaatgcattgataa |     |
| 11S91-cBrMYB2   | GTATGGAGAAGGGAAATGGCACCAGTTCCTTTAAGAGCTGCTCTAAATCGGTGCAGGAAGAGTTGTAGACTAAGATGGT     | 160 |
| 14S838-cBrMYB2  | GTATGGAGAAGGGAAATGGCACCAGTTCCTTTAAGAGCTGCTCTAAATCGGTGCAGGAAGAGTTGTAGACTAAGATGGT     | 160 |
| 95T2-5-cBrMYB2  | GTATGGAGAAGGGAAATGGCACCAGTTCCTTTAAGAGCTGCTCTAAATCGGTGCAGGAAGAGTTGTAGACTAAGATGGT     | 160 |
| Z33-cBrMYB2     | GTATGGAGAAGGGAAATGGCACCAGTTCCTTTAAGAGCTGCTCTAAATCGGTGCAGGAAGAGTTGTAGACTAAGATGGT     | 160 |
| Z190-cBrMYB2    | GTATGGAGAAGGGAAATGGCACCAGTTCCTTTAAGAGCTGCTCTAAATCGGTGCAGGAAGAGTTGTAGACTAAGATGGT     | 160 |
| Z240-cBrMYB2    | GTATGGAGAAGGGAAATGGCACCAGTTCCTTTAAGAGCTGCTCTAAATCGGTGCAGGAAGAGTTGTAGACTAAGATGGT     | 160 |
| Chifu-cBrMYB2   | GTATGGAGAAGGGAAATGGCACCAGTTCCTTTAAGAGCTGCTCTAAATCGGTGCAGGAAGAGTTGTAGACTAAGATGGT     | 160 |
| 13S93-cBrmyb2   | GTATGGAGAAGGGAAATGGCACCAGTTCCTTTAAGAGCTGCTCTAAATCGGTGCAGGAAGAGTTGTAGACTAAGATGGT     | 160 |
| 13S1147-cBrmyb2 | GTATGGAGAAGGGAAATGGCACCAGTTCCTTTAAGAGCTGCTCTAAATCGGTGCAGGAAGAGTTGTAGACTAAGATGGT     | 160 |
| 15S1080-cBrmyb2 | GTATGGAGAAGGGAAATGGCACCAGTTCCTTTAAGAGCTGCTCTAAATCGGTGCAGGAAGAGTTGTAGACTAAGATGGT     | 160 |
| 15S1084-cBrmyb2 | GTATGGAGAAGGGAAATGGCACCAGTTCCTTTAAGAGCTGCTCTAAATCGGTGCAGGAAGAGTTGTAGACTAAGATGGT     | 160 |
| 94S17-cBrmyb2   | GTATGGAGAAGGGAAATGGCACCAGTTCCTTTAAGAGCTGCTCTAAATCGGTGCAGGAAGAGTTGTAGACTAAGATGGT     | 160 |
| Consensus       | gtatggagaagggaaatggcaccagttcctttaagagctgctctaaatcgggtgcaggaagagttgtagactaagatggt    |     |
| 11S91-cBrMYB2   | TGAACACTATTTGAAGCCAAGTATCAAGAGAGGAAAACCTCAACICCGATGAAGTTGATCTTCTTATTCGCCTTCATAAGCTT | 240 |
| 14S838-cBrMYB2  | TGAACACTATTTGAAGCCAAGTATCAAGAGAGGAAAACCTCAACICCGATGAAGTTGATCTTCTTATTCGCCTTCATAAGCTT | 240 |
| 95T2-5-cBrMYB2  | TGAACACTATTTGAAGCCAAGTATCAAGAGAGGAAAACCTCAACICCGATGAAGTTGATCTTCTTATTCGCCTTCATAAGCTT | 240 |
| Z33-cBrMYB2     | TGAACACTATTTGAAGCCAAGTATCAAGAGAGGAAAACCTCAACICCGATGAAGTTGATCTTCTTATTCGCCTTCATAAGCTT | 240 |
| Z190-cBrMYB2    | TGAACACTATTTGAAGCCAAGTATCAAGAGAGGAAAACCTCAACICCGATGAAGTTGATCTTCTTATTCGCCTTCATAAGCTT | 240 |
| Z240-cBrMYB2    | TGAACACTATTTGAAGCCAAGTATCAAGAGAGGAAAACCTCAACICCGATGAAGTTGATCTTCTTATTCGCCTTCATAAGCTT | 240 |
| Chifu-cBrMYB2   | TGAACACTATTTGAAGCCAAGTATCAAGAGAGGAAAACCTCAACICCGATGAAGTTGATCTTCTTATTCGCCTTCATAAGCTT | 240 |
| 13S93-cBrmyb2   | TGAACACTATTTGAAGCCAAGTATCAAGAGAGGAAAACCTCAACICCGATGAAGTTGATCTTCTTATTCGCCTTCATAAGCTT | 240 |
| 13S1147-cBrmyb2 | TGAACACTATTTGAAGCCAAGTATCAAGAGAGGAAAACCTCAACICCGATGAAGTTGATCTTCTTATTCGCCTTCATAAGCTT | 240 |
| 15S1080-cBrmyb2 | TGAACACTATTTGAAGCCAAGTATCAAGAGAGGAAAACCTCAACICCGATGAAGTTGATCTTCTTATTCGCCTTCATAAGCTT | 240 |
| 15S1084-cBrmyb2 | TGAACACTATTTGAAGCCAAGTATCAAGAGAGGAAAACCTCAACICCGATGAAGTTGATCTTCTTATTCGCCTTCATAAGCTT | 240 |
| 94S17-cBrmyb2   | TGAACACTATTTGAAGCCAAGTATCAAGAGAGGAAAACCTCAACICCGATGAAGTTGATCTTCTTATTCGCCTTCATAAGCTT | 240 |
| Consensus       | tgaactatTTGAAGCCAAGTATCAAGAGAGGAAAACCTCAACICCGATGAAGTTGATCTTCTTATTCGCCTTCATAAGCTT   |     |
| 11S91-cBrMYB2   | TTAGGAAACAGGTGGTCTTTAATTGCTGGTAGATTACCCGGICGGACCGCCAATGACGTCAAAAATTACTGGAACACCCA    | 320 |
| 14S838-cBrMYB2  | TTAGGAAACAGGTGGTCTTTAATTGCTGGTAGATTACCCGGICGGACCGCCAATGACGTCAAAAATTACTGGAACACCCA    | 320 |
| 95T2-5-cBrMYB2  | TTAGGAAACAGGTGGTCTTTAATTGCTGGTAGATTACCCGGICGGACCGCCAATGACGTCAAAAATTACTGGAACACCCA    | 320 |
| Z33-cBrMYB2     | TTAGGAAACAGGTGGTCTTTAATTGCTGGTAGATTACCCGGICGGACCGCCAATGACGTCAAAAATTACTGGAACACCCA    | 320 |
| Z190-cBrMYB2    | TTAGGAAACAGGTGGTCTTTAATTGCTGGTAGATTACCCGGICGGACCGCCAATGACGTCAAAAATTACTGGAACACCCA    | 320 |
| Z240-cBrMYB2    | TTAGGAAACAGGTGGTCTTTAATTGCTGGTAGATTACCCGGICGGACCGCCAATGACGTCAAAAATTACTGGAACACCCA    | 320 |
| Chifu-cBrMYB2   | TTAGGAAACAGGTGGTCTTTAATTGCTGGTAGATTACCCGGICGGACCGCCAATGACGTCAAAAATTACTGGAACACCCA    | 320 |
| 13S93-cBrmyb2   | TTAGGAAACAGGTGGTCTTTAATTGCTGGTAGATTACCCGGICGGACCGCCAATGACGTCAAAAATTACTGGAACACCCA    | 320 |
| 13S1147-cBrmyb2 | TTAGGAAACAGGTGGTCTTTAATTGCTGGTAGATTACCCGGICGGACCGCCAATGACGTCAAAAATTACTGGAACACCCA    | 320 |
| 15S1080-cBrmyb2 | TTAGGAAACAGGTGGTCTTTAATTGCTGGTAGATTACCCGGICGGACCGCCAATGACGTCAAAAATTACTGGAACACCCA    | 320 |
| 15S1084-cBrmyb2 | TTAGGAAACAGGTGGTCTTTAATTGCTGGTAGATTACCCGGICGGACCGCCAATGACGTCAAAAATTACTGGAACACCCA    | 320 |
| 94S17-cBrmyb2   | TTAGGAAACAGGTGGTCTTTAATTGCTGGTAGATTACCCGGICGGACCGCCAATGACGTCAAAAATTACTGGAACACCCA    | 320 |
| Consensus       | ttaggaaacaggtggtctTTAATTGCTGGTAGATTACCCGGICGGACCGCCAATGACGTCAAAAATTACTGGAACACCCA    |     |
| 11S91-cBrMYB2   | TTTGAGTAAGAAACATGAACCGGGTTGTAAGACCCAGATGAAAAAGAGAAACATTCCTTGCTCTTATACCACACCAGCCC    | 400 |
| 14S838-cBrMYB2  | TTTGAGTAAGAAACATGAACCGGGTTGTAAGACCCAGATGAAAAAGAGAAACATTCCTTGCTCTTATACCACACCAGCCC    | 400 |
| 95T2-5-cBrMYB2  | TTTGAGTAAGAAACATGAACCGGGTTGTAAGACCCAGATGAAAAAGAGAAACATTCCTTGCTCTTATACCACACCAGCCC    | 400 |
| Z33-cBrMYB2     | TTTGAGTAAGAAACATGAACCGGGTTGTAAGACCCAGATGAAAAAGAGAAACATTCCTTGCTCTTATACCACACCAGCCC    | 400 |
| Z190-cBrMYB2    | TTTGAGTAAGAAACATGAACCGGGTTGTAAGACCCAGATGAAAAAGAGAAACATTCCTTGCTCTTATACCACACCAGCCC    | 400 |
| Z240-cBrMYB2    | TTTGAGTAAGAAACATGAACCGGGTTGTAAGACCCAGATGAAAAAGAGAAACATTCCTTGCTCTTATACCACACCAGCCC    | 400 |
| Chifu-cBrMYB2   | TTTGAGTAAGAAACATGAACCGGGTTGTAAGACCCAGATGAAAAAGAGAAACATTCCTTGCTCTTATACCACACCAGCCC    | 400 |
| 13S93-cBrmyb2   | TTTGAGTAAGAAACATGAACCGGGTTGTAAGACCCAGATGAAAAAGAGAAACATTCCTTGCTCTTATACCACACCAGCCC    | 400 |
| 13S1147-cBrmyb2 | TTTGAGTAAGAAACATGAACCGGGTTGTAAGACCCAGATGAAAAAGAGAAACATTCCTTGCTCTTATACCACACCAGCCC    | 400 |
| 15S1080-cBrmyb2 | TTTGAGTAAGAAACATGAACCGGGTTGTAAGACCCAGATGAAAAAGAGAAACATTCCTTGCTCTTATACCACACCAGCCC    | 400 |
| 15S1084-cBrmyb2 | TTTGAGTAAGAAACATGAACCGGGTTGTAAGACCCAGATGAAAAAGAGAAACATTCCTTGCTCTTATACCACACCAGCCC    | 400 |
| 94S17-cBrmyb2   | TTTGAGTAAGAAACATGAACCGGGTTGTAAGACCCAGATGAAAAAGAGAAACATTCCTTGCTCTTATACCACACCAGCCC    | 400 |
| Consensus       | tttgagtaagaaacatgaaccgggttGTAAGACCCAGATGAAAAAGAGAAACATTCCTTGCTCTTATACCACACCAGCCC    |     |

|                 |                                                                                  |     |
|-----------------|----------------------------------------------------------------------------------|-----|
| 11S91-cBrMYB2   | AAAAAATCGACGTTTTCAAACCTCGACCTCGATCCTTACCCETTAACAGCGGCTGCAGCCATAATAATGGCATGCCAGAA | 480 |
| 14S838-cBrMYB2  | AAAAAATCGACGTTTTCAAACCTCGACCTCGATCCTTACCCETTAACAGCGGCTGCAGCCATAATAATGGCATGCCAGAA | 480 |
| 95T2-5-cBrMYB2  | AAAAAATCGACGTTTTCAAACCTCGACCTCGATCCTTACCCETTAACAGCGGCTGCAGCCATAATAATGGCATGCCAGAA | 480 |
| 233-cBrMYB2     | AAAAAATCGACGTTTTCAAACCTCGACCTCGATCCTTACCCETTAACAGCGGCTGCAGCCATAATAATGGCATGCCAGAA | 480 |
| Z190-cBrMYB2    | AAAAAATCGACGTTTTCAAACCTCGACCTCGATCCTTACCCETTAACAGCGGCTGCAGCCATAATAATGGCATGCCAGAA | 480 |
| Z240-cBrMYB2    | AAAAAATCGACGTTTTCAAACCTCGACCTCGATCCTTACCCETTAACAGCGGCTGCAGCCATAATAATGGCATGCCAGAA | 480 |
| Chifu-cBrMYB2   | AAAAAATCGACGTTTTCAAACCTCGACCTCGATCCTTACCCETTAACAGCGGCTGCAGCCATAATAATGGCATGCCAGAA | 480 |
| 13S93-cBrmyb2   | AAAAAATCGACGTTTTCAAACCTCGACCTCGATCCTTACCCETTAACAGCGGCTGCAGCCATAATAATGGCATGCCAGAA | 480 |
| 13S1147-cBrmyb2 | AAAAAATCGACGTTTTCAAACCTCGACCTCGATCCTTACCCETTAACAGCGGCTGCAGCCATAATAATGGCATGCCAGAA | 480 |
| 15S1080-cBrmyb2 | AAAAAATCGACGTTTTCAAACCTCGACCTCGATCCTTACCCETTAACAGCGGCTGCAGCCATAATAATGGCATGCCAGAA | 480 |
| 15S1084-cBrmyb2 | AAAAAATCGACGTTTTCAAACCTCGACCTCGATCCTTACCCETTAACAGCGGCTGCAGCCATAATAATGGCATGCCAGAA | 480 |
| 94S17-cBrmyb2   | AAAAAATCGACGTTTTCAAACCTCGACCTCGATCCTTACCCETTAACAGCGGCTGCAGCCATAATAATGGCATGCCAGAA | 480 |
| Consensus       | aaaaaatcgacgTTTTCAAACCTCGACCTCGATCCTTACCCETTAACAGCGGCTGCAGCCATAATAATGGCATGCCAGAA |     |

|                 |                                                                                       |     |
|-----------------|---------------------------------------------------------------------------------------|-----|
| 11S91-cBrMYB2   | GCTGGCATTGTTCCCTCTATGCCTTGGACACAACGATACTAAIAATGTTTCTGAAAAATAAATCACATGTAACAAAAGATGA    | 560 |
| 14S838-cBrMYB2  | GCTGGCATTGTTCCCTCTATGCCTTGGACACAACGATACTAAIAATGTTTCTGAAAAATAAATCACATGTAACAAAAGATGA    | 560 |
| 95T2-5-cBrMYB2  | GCTGGCATTGTTCCCTCTATGCCTTGGACACAACGATACTAAIAATGTTTCTGAAAAATAAATCACATGTAACAAAAGATGA    | 560 |
| 233-cBrMYB2     | GCTGGCATTGTTCCCTCTATGCCTTGGACACAACGATACTAAIAATGTTTCTGAAAAATAAATCACATGTAACAAAAGATGA    | 560 |
| Z190-cBrMYB2    | GCTGGCATTGTTCCCTCTATGCCTTGGACACAACGATACTAAIAATGTTTCTGAAAAATAAATCACATGTAACAAAAGATGA    | 560 |
| Z240-cBrMYB2    | GCTGGCATTGTTCCCTCTATGCCTTGGACACAACGATACTAAIAATGTTTCTGAAAAATAAATCACATGTAACAAAAGATGA    | 560 |
| Chifu-cBrMYB2   | GCTGGCATTGTTCCCTCTATGCCTTGGACACAACGATACTAAIAATGTTTCTGAAAAATAAATCACATGTAACAAAAGATGA    | 560 |
| 13S93-cBrmyb2   | GCTGGCATTGTTCCCTCTATGCCTTGGACACAACGATACTAAIAATGTTTCTGAAAAATAAATCACATGTAACAAAAGATGA    | 560 |
| 13S1147-cBrmyb2 | GCTGGCATTGTTCCCTCTATGCCTTGGACACAACGATACTAAIAATGTTTCTGAAAAATAAATCACATGTAACAAAAGATGA    | 560 |
| 15S1080-cBrmyb2 | GCTGGCATTGTTCCCTCTATGCCTTGGACACAACGATACTAAIAATGTTTCTGAAAAATAAATCACATGTAACAAAAGATGA    | 560 |
| 15S1084-cBrmyb2 | GCTGGCATTGTTCCCTCTATGCCTTGGACACAACGATACTAAIAATGTTTCTGAAAAATAAATCACATGTAACAAAAGATGA    | 560 |
| 94S17-cBrmyb2   | GCTGGCATTGTTCCCTCTATGCCTTGGACACAACGATACTAAIAATGTTTCTGAAAAATAAATCACATGTAACAAAAGATGA    | 560 |
| Consensus       | gctg c attgttccctctatgccttggacacaacgataactaaiaatgTTTTCTGAAAAATAAATCACATGTAACAAAAGATGA |     |

|                 |                                                                                     |     |
|-----------------|-------------------------------------------------------------------------------------|-----|
| 11S91-cBrMYB2   | TGATAAATCTGAGCTTGTAGTCATTTAATGGATGGTCAGAATAGGTGGTGGGAAAAGTTTGCTAGATGAGAGCCAAGATC    | 640 |
| 14S838-cBrMYB2  | TGATAAATCTGAGCTTGTAGTCATTTAATGGATGGTCAGAATAGGTGGTGGGAAAAGTTTGCTAGATGAGAGCCAAGATC    | 640 |
| 95T2-5-cBrMYB2  | TGATAAATCTGAGCTTGTAGTCATTTAATGGATGGTCAGAATAGGTGGTGGGAAAAGTTTGCTAGATGAGAGCCAAGATC    | 640 |
| 233-cBrMYB2     | TGATAAATCTGAGCTTGTAGTCATTTAATGGATGGTCAGAATAGGTGGTGGGAAAAGTTTGCTAGATGAGAGCCAAGATC    | 640 |
| Z190-cBrMYB2    | TGATAAATCTGAGCTTGTAGTCATTTAATGGATGGTCAGAATAGGTGGTGGGAAAAGTTTGCTAGATGAGAGCCAAGATC    | 640 |
| Z240-cBrMYB2    | TGATAAATCTGAGCTTGTAGTCATTTAATGGATGGTCAGAATAGGTGGTGGGAAAAGTTTGCTAGATGAGAGCCAAGATC    | 640 |
| Chifu-cBrMYB2   | TGATAAATCTGAGCTTGTAGTCATTTAATGGATGGTCAGAATAGGTGGTGGGAAAAGTTTGCTAGATGAGAGCCAAGATC    | 640 |
| 13S93-cBrmyb2   | TGATAAATCTGAGCTTGTAGTCATTTAATGGATGGTCAGAATAGGTGGTGGGAAAAGTTTGCTAGATGAGAGCCAAGATC    | 640 |
| 13S1147-cBrmyb2 | TGATAAATCTGAGCTTGTAGTCATTTAATGGATGGTCAGAATAGGTGGTGGGAAAAGTTTGCTAGATGAGAGCCAAGATC    | 640 |
| 15S1080-cBrmyb2 | TGATAAATCTGAGCTTGTAGTCATTTAATGGATGGTCAGAATAGGTGGTGGGAAAAGTTTGCTAGATGAGAGCCAAGATC    | 640 |
| 15S1084-cBrmyb2 | TGATAAATCTGAGCTTGTAGTCATTTAATGGATGGTCAGAATAGGTGGTGGGAAAAGTTTGCTAGATGAGAGCCAAGATC    | 640 |
| 94S17-cBrmyb2   | TGATAAATCTGAGCTTGTAGTCATTTAATGGATGGTCAGAATAGGTGGTGGGAAAAGTTTGCTAGATGAGAGCCAAGATC    | 640 |
| Consensus       | tgataaactctgagcttgttagtcattttaatggatggtcagaataggtggTGGGAAAAGTTTGCTAGATGAGAGCCAAGATC |     |

|                 |                                                                                  |     |
|-----------------|----------------------------------------------------------------------------------|-----|
| 11S91-cBrMYB2   | CAGCTGCGCTCTTTCCAGAAACTACAGCAATAAAAAAGGGCCCAACCTCCCGGTTTGACGTTGAGCAACTTTGGAGCCTG | 720 |
| 14S838-cBrMYB2  | CAGCTGCGCTCTTTCCAGAAACTACAGCAATAAAAAAGGGCCCAACCTCCCGGTTTGACGTTGAGCAACTTTGGAGCCTG | 720 |
| 95T2-5-cBrMYB2  | CAGCTGCGCTCTTTCCAGAAACTACAGCAATAAAAAAGGGCCCAACCTCCCGGTTTGACGTTGAGCAACTTTGGAGCCTG | 720 |
| 233-cBrMYB2     | CAGCTGCGCTCTTTCCAGAAACTACAGCAATAAAAAAGGGCCCAACCTCCCGGTTTGACGTTGAGCAACTTTGGAGCCTG | 720 |
| Z190-cBrMYB2    | CAGCTGCGCTCTTTCCAGAAACTACAGCAATAAAAAAGGGCCCAACCTCCCGGTTTGACGTTGAGCAACTTTGGAGCCTG | 720 |
| Z240-cBrMYB2    | CAGCTGCGCTCTTTCCAGAAACTACAGCAATAAAAAAGGGCCCAACCTCCCGGTTTGACGTTGAGCAACTTTGGAGCCTG | 720 |
| Chifu-cBrMYB2   | CAGCTGCGCTCTTTCCAGAAACTACAGCAATAAAAAAGGGCCCAACCTCCCGGTTTGACGTTGAGCAACTTTGGAGCCTG | 720 |
| 13S93-cBrmyb2   | CAGCTGCGCTCTTTCCAGAAACTACAGCAATAAAAAAGGGCCCAACCTCCCGGTTTGACGTTGAGCAACTTTGGAGCCTG | 720 |
| 13S1147-cBrmyb2 | CAGCTGCGCTCTTTCCAGAAACTACAGCAATAAAAAAGGGCCCAACCTCCCGGTTTGACGTTGAGCAACTTTGGAGCCTG | 720 |
| 15S1080-cBrmyb2 | CAGCTGCGCTCTTTCCAGAAACTACAGCAATAAAAAAGGGCCCAACCTCCCGGTTTGACGTTGAGCAACTTTGGAGCCTG | 720 |
| 15S1084-cBrmyb2 | CAGCTGCGCTCTTTCCAGAAACTACAGCAATAAAAAAGGGCCCAACCTCCCGGTTTGACGTTGAGCAACTTTGGAGCCTG | 720 |
| 94S17-cBrmyb2   | CAGCTGCGCTCTTTCCAGAAACTACAGCAATAAAAAAGGGCCCAACCTCCCGGTTTGACGTTGAGCAACTTTGGAGCCTG | 720 |
| Consensus       | cagctgCGCTCTTTCCAGAAACTACAGCAATAAAAAAGGGCCCAACCTCCCGGTTTGACGTTGAGCAACTTTGGAGCCTG |     |

|                 |                         |     |
|-----------------|-------------------------|-----|
| 11S91-cBrMYB2   | TTGGATGGAGAAACTGGAACCTG | 743 |
| 14S838-cBrMYB2  | TTGGATGGAGAAACTGGAACCTG | 743 |
| 95T2-5-cBrMYB2  | TTGGATGGAGAAACTGGAACCTG | 743 |
| 233-cBrMYB2     | TTGGATGGAGAAACTGGAACCTG | 743 |
| Z190-cBrMYB2    | TTGGATGGAGAAACTGGAACCTG | 743 |
| Z240-cBrMYB2    | TTGGATGGAGAAACTGGAACCTG | 743 |
| Chifu-cBrMYB2   | TTGGATGGAGAAACTGGAACCTG | 743 |
| 13S93-cBrmyb2   | TTGGATGGAGAAACTGGAACCTG | 743 |
| 13S1147-cBrmyb2 | TTGGATGGAGAAACTGGAACCTG | 743 |
| 15S1080-cBrmyb2 | TTGGATGGAGAAACTGGAACCTG | 743 |
| 15S1084-cBrmyb2 | TTGGATGGAGAAACTGGAACCTG | 743 |
| 94S17-cBrmyb2   | TTGGATGGAGAAACTGGAACCTG | 743 |
| Consensus       | ttggatggagaaactggaacttg |     |

**d** Multiple sequence alignment analysis of *gBrMYB2* between purple head Chinese cabbage ‘11S91’ and its female parent ‘94S17’. ‘95T2-5’ and ‘11S91’ had consensus genomic DNA sequence (gDNA).

|               |                                                                                                             |      |
|---------------|-------------------------------------------------------------------------------------------------------------|------|
| 11S91-gBrMYB2 | ATGGAGGGTTCGTCCCAAGGTTGAAAAAGGTGCATGGACTGCTGAAGAAGATAATCTCTTGAGGCAATGCATTGATAAGTATGGAGAAGGGAAATGGC          | 100  |
| 94S17-gBrmyb2 | ATGGAGGGTTCGTCCCAAGGTTGAAAAAGGTGCATGGACTGCTGAAGAAGATAATCTCTTGAGGCAATGCATTGATAAGTATGGAGAAGGGAAATGGC          | 100  |
| Consensus     | atggaggggttcgtcccaagggttgaaaaagggtgcatggactgctgaagaagataatctcttgaggcaatgcattgataagatggagaagggaaatggc        |      |
| 11S91-gBrMYB2 | ACCAAGTTCCTTTAAGAGCTGGTATGTC.....TTTTTTTTGATAACATAAGAGCTGGTATGCTACTTTTATAATTTT.....CACACACACACACACACATA     | 197  |
| 94S17-gBrmyb2 | ACCAAGTTCCTTTAAGAGCTGGTATGTC.....TTTTTTTTGATAACATAAGAGCTGGTATGCTACTTTTATAATTTT.....CACACACACACACACACATA     | 200  |
| Consensus     | accaagttcctttaagagctggtatgtc.....ttttttttgataacataagagctggtatgctactttttataatttt.....cacacacacacacacacata    |      |
| 11S91-gBrMYB2 | TAACATAAAGTACGTATATTCITTTTATTTTTCAGTACATTTATTCITCTCTCTGTCTAGTATTAGGAAATTAATTAACACCCGGGTACACAATCA            | 297  |
| 94S17-gBrmyb2 | TAACATAAAGTACGTATATTCITTTTATTTTTCAGTACATTTATTCITCTCTCTGTCTAGTATTAGGAAATTAATTAACACCCGGGTACACAATCA            | 300  |
| Consensus     | taacataaagtacgtatattctttttattttttcagtacatttattctctctctgtctagattaggaaattaattaacacccgggtacacaatca             |      |
| 11S91-gBrMYB2 | TTGTTTTCTTTTCGTTTTAATGAAGGAATCATAGATTCATATGTTCTAATGTTTTTCATG.....AAAAAAAACATTTCGCTTCTTCATGTTTAAATTACAAA     | 397  |
| 94S17-gBrmyb2 | TTGTTTTCTTTTCGTTTTAATGAAGGAATCATAGATTCATATGTTCTAATGTTTTTCATG.....AAAAAAAACATTTCGCTTCTTCATGTTTAAATTACAAA     | 398  |
| Consensus     | ttgttttcttttcgttttaatgaaggaatcatagattcatatgttctaatgtttttcatg.....aaaaaaaacatttcgcttcttcatgtttaattacaaa      |      |
| 11S91-gBrMYB2 | GCGAGAAAATGCAACTCTCTTTATTGATTCGTCGTTTTCTTTTTTTTTTTGAGAAAAGAGCTTTTTTGATTAGTGAACTTTTCTGCACGAACCCGTGTG         | 497  |
| 94S17-gBrmyb2 | GCGAGAAAATGCAACTCTCTTTATTGATTCGTCGTTTTCTTTTTTTTTTTGAGAAAAGAGCTTTTTTGATTAGTGAACTTTTCTGCACGAACCCGTGTG         | 498  |
| Consensus     | gcgagaaaatgcaactctctttattgattcgtcgttttctttttttttgagaaaagagcttttttgattagtgaacttttctgcacgaacccgtgtg           |      |
| 11S91-gBrMYB2 | TTTGTGGAATATGTTGTTTATTTCGGTGTACTTTGATCCTTC.....TGATAAAAATTTACTTCCTTTGTT.....TTAAATATAAGATATTTTGGTAGAAGCA    | 597  |
| 94S17-gBrmyb2 | TTTGTGGAATATGTTGTTTATTTCGGTGTACTTTGATCCTTC.....TGATAAAAATTTACTTCCTTTGTT.....TTAAATATAAGATATTTTGGTAGAAGCA    | 598  |
| Consensus     | tttgtggaatatgttgttttatttcgggtgtactttgatccttct.....tgataaaaatttacttccctttgtt.....ttaaataaagatattttggtagaagca |      |
| 11S91-gBrMYB2 | CATATTAAGAAAACATTTTTTGTCTAGAAAATATCATTAAAACATAAAATTAATGGTGTTCACCAATTACAAAATAGACTATTAATAATGATTGGGT           | 697  |
| 94S17-gBrmyb2 | CATATTAAGAAAACATTTTTTGTCTAGAAAATATCATTAAAACATAAAATTAATGGTGTTCACCAATTACAAAATAGACTATTAATAATGATTGGGT           | 698  |
| Consensus     | catattaagaaaactatfttttgttctagaaaatcattaaaactataaaatggtgttcaaccaattacaaaatagactatataaatgatgggt               |      |
| 11S91-gBrMYB2 | TCACAGTTTTTAATAAAGTAAAAGTTACCTAGAAAATGAAAACATTTTATA.....                                                    | 749  |
| 94S17-gBrmyb2 | TCACAGTTTTTAATAAAGTAAAAGTTACCTAGAAAATGAAAACATTTTATA.....TCTAATACTATAAAGAAGACTATTCTCTCTCTCAGCTTGCCACGTC      | 798  |
| Consensus     | tcacagtttttaataaagttaaagttacctagaaaattgaaaacatftttata.....                                                  |      |
| 11S91-gBrMYB2 | .....                                                                                                       | 749  |
| 94S17-gBrmyb2 | ACTGAATCGAATTCCTAACATGCGACACGTGTTTCGTGCTCATGTTATACTCTGCGTTTCATTAAAGCTTGATGTGGGCTGGTGTTCGAATTACGGTTTT        | 898  |
| Consensus     | .....                                                                                                       |      |
| 11S91-gBrMYB2 | .....                                                                                                       | 749  |
| 94S17-gBrmyb2 | GATACATATGGATCTCAATAATAATAGGCCATTTCAAATCATGAGAGATGCAAGCCGATTAGGGTTTCTGCTCTTCTTCTCATCGACCAAAAACA             | 998  |
| Consensus     | .....                                                                                                       |      |
| 11S91-gBrMYB2 | .....                                                                                                       | 749  |
| 94S17-gBrmyb2 | GTTCCCAAAACAAAATGATGGGATTTTCGAGGTATCTCTTTGTTGATCTTCGATGGCCTCGTTCTGGTTACTCTCCTAATTAGATGAAACGCTCCAAGTT        | 1098 |
| Consensus     | .....                                                                                                       |      |
| 11S91-gBrMYB2 | .....                                                                                                       | 749  |
| 94S17-gBrmyb2 | ACAGATCCATAGCCTTTATGACCTCTTAACCTCAAAGACCGAAATGAGGCACGATCTGACGTTGAATGCGAGTTTACTCTCTGTGAGGCGGTGTAATCT         | 1198 |
| Consensus     | .....                                                                                                       |      |
| 11S91-gBrMYB2 | .....                                                                                                       | 749  |
| 94S17-gBrmyb2 | ACACAATATAAAGGTTAGCATCCTCCCTTGAACATCATCCTCGAAATCTAATAAAAACITCAAGGTAGTAGCTTTTGTGTTGATGTTTATCAAACCTCTA        | 1298 |
| Consensus     | .....                                                                                                       |      |
| 11S91-gBrMYB2 | .....                                                                                                       | 749  |
| 94S17-gBrmyb2 | GGTTTTGTTGGTTCTTTGCTTTCTATTCTCTCCCAAGATCGTTAGATAAACATTTCCGGATCGCTTTTGATAATTTTTTTGTTCTTATCTACAGTT            | 1398 |
| Consensus     | .....                                                                                                       |      |
| 11S91-gBrMYB2 | .....                                                                                                       | 749  |
| 94S17-gBrmyb2 | GGCTCAACACAAGCCACATGGTGTGGAAGATCTTTTACAACAGTCGTTCACTGTGAACCGGGGATTTTCGGAAGGCTATGGCAAAGATTCTGTGTGAGGA        | 1498 |
| Consensus     | .....                                                                                                       |      |
| 11S91-gBrMYB2 | .....                                                                                                       | 749  |
| 94S17-gBrmyb2 | GATGAGTTGAGATGAGGATGAGAGTCTTACTTTTCTTTTGAAGAAATGATTGACGGTTCAAGACAATTAATCCATTAGCGCCCGCAACCTGTGGGAAG          | 1598 |
| Consensus     | .....                                                                                                       |      |
| 11S91-gBrMYB2 | .....                                                                                                       | 749  |
| 94S17-gBrmyb2 | AGCTTTCGTAGTGTGTTTGTGTTTACTCGCCGGTGGCGTTGCGGAAGTTCAATTCATCGGCACCGTTTAAATGGCAACACCGACTCACTTCATCTCATCTCT      | 1698 |
| Consensus     | .....                                                                                                       |      |
| 11S91-gBrMYB2 | .....                                                                                                       | 749  |
| 94S17-gBrmyb2 | TTGGGACGACACTCGCCCGTGGTAACATGCTTCTTATTGTCGGTGTGGTGACGTCAGCCTCTCCACACATTCAAACCGATGTTATTGACAATCAAAT           | 1798 |
| Consensus     | .....                                                                                                       |      |

|               |                                                                                                        |      |
|---------------|--------------------------------------------------------------------------------------------------------|------|
| 11S91-gBrMYB2 | .....                                                                                                  | 749  |
| 94S17-gBrmyb2 | ATTATGCAGCCTTTCTCAACATACAGAGCTTCCATAGTATTGTTAAATCTTAATCATGTCTGAGGATACCATCACCGTCCCTCTCAGCTGCTGGAAT      | 1898 |
| Consensus     |                                                                                                        |      |
| 11S91-gBrMYB2 | .....                                                                                                  | 749  |
| 94S17-gBrmyb2 | GTACTCAGCTTGGTTGGATGGAGCGTCTGCTTGGCTGGAATTCAGAAAATCTGCTCCAAAGGAACCTGTCTGAACGTCATGATGCCTTTGGCCAAGAA     | 1998 |
| Consensus     |                                                                                                        |      |
| 11S91-gBrMYB2 | .....                                                                                                  | 749  |
| 94S17-gBrmyb2 | TTATAACATGGTGGCTGATCCAAGAAATACCTGACATTCGAATCTTCTTAAGAGCACCAGATGTAAACATGTGACGAGGTGTCAAAGCTCTTCTAGATT    | 2098 |
| Consensus     |                                                                                                        |      |
| 11S91-gBrMYB2 | .....                                                                                                  | 749  |
| 94S17-gBrmyb2 | GTAAGATTGGTCTCCATTGTTGTTTACTTAGGGTAAAGTTCTATTGCTTTGATCACTTCAACTTGCAAAATAGTGTAAACGGAACACATTCTATG        | 2198 |
| Consensus     |                                                                                                        |      |
| 11S91-gBrMYB2 | .....                                                                                                  | 749  |
| 94S17-gBrmyb2 | CACIAATCTTATTCCATCATTCTTACTCCACTAATCAAGTTCAGTCCACGACTATTTATCATCCAGGAATCAAGTCTATTGTTAAATATAT            | 2298 |
| Consensus     |                                                                                                        |      |
| 11S91-gBrMYB2 | .....                                                                                                  | 749  |
| 94S17-gBrmyb2 | TTGGAATCAGACAGCCAAAGCTATCCACAAATTTATGAACAATCTCTTCAAGACAAACTTATAATACACTGCCACTTTCAAAAATGTTTTGTGTA        | 2398 |
| Consensus     |                                                                                                        |      |
| 11S91-gBrMYB2 | .....                                                                                                  | 749  |
| 94S17-gBrmyb2 | CACITCTTTGGACAGACGAAAATATGACCGTCTTATTAATGGTAAGTCTGGCTCAAACCAAGCATCAATGCCATCACGTTCTCTCTTATTATCTGA       | 2498 |
| Consensus     |                                                                                                        |      |
| 11S91-gBrMYB2 | .....                                                                                                  | 749  |
| 94S17-gBrmyb2 | AAGGAGCAAGAGGAAAGCAGTTGTAGCACAGTCATGTTCCAGCTCCATATTTACAGAAAGCCATCATTGCCGAGTTGAGTTGCAGTATTGTGTAAGAT     | 2598 |
| Consensus     |                                                                                                        |      |
| 11S91-gBrMYB2 | .....                                                                                                  | 749  |
| 94S17-gBrmyb2 | TTCTAACCCAGGAGTTTAGTGTGGAAAAATATAATTGGAGTGCAGTGTITATACCGAAAAGTCTCAGGCAGAGATATTGTGTAGTCTAAATGTCAT       | 2698 |
| Consensus     |                                                                                                        |      |
| 11S91-gBrMYB2 | .....                                                                                                  | 749  |
| 94S17-gBrmyb2 | AAAAGGACAGAAAATATAGTAGTGAATCTGTTTTTTGTGCCAGTTATATCTCCGACTGTAGCTTGAAGAGCAAACTATCTAAGAGAGGTGAGATTG       | 2798 |
| Consensus     |                                                                                                        |      |
| 11S91-gBrMYB2 | .....                                                                                                  | 749  |
| 94S17-gBrmyb2 | GTTTTAATCTGCCATTTCTGGAGAGTTGTGAAGATGTTGAAGAGAGCAAGGTGAAGAAATGTATTGCTCACGCTGGGTTGTAAGAGACAGTCTTAGCTA    | 2898 |
| Consensus     |                                                                                                        |      |
| 11S91-gBrMYB2 | .....                                                                                                  | 749  |
| 94S17-gBrmyb2 | TTGGTTCTGATTCAGATTTTTCAGCTGCAAAATCTCAGACCGGTTTCTAAACCCAAAACAGCCITTTGGAAGACTTCTTTTTGTGTGTTCTCCTG        | 2998 |
| Consensus     |                                                                                                        |      |
| 11S91-gBrMYB2 | .....                                                                                                  | 749  |
| 94S17-gBrmyb2 | GCGGTGATGGGCTACGGATCGCTGTGGTGACAGTGCAAAGGGGAGTGTGTGCGGGTGTATCAATCAATACTATAACAATCTTTGCTTACAAAGCTG       | 3098 |
| Consensus     |                                                                                                        |      |
| 11S91-gBrMYB2 | .....                                                                                                  | 749  |
| 94S17-gBrmyb2 | TGTAAAGTATATTGTTATTATATAATGGTAAAAGAGTCGAAGTTGATGCTCAGTGGAGGAAATGAAGTAATGGAAAAAACTCCACTAGATGCAAGA       | 3198 |
| Consensus     |                                                                                                        |      |
| 11S91-gBrMYB2 | .....                                                                                                  | 749  |
| 94S17-gBrmyb2 | AACAATAGTTTTCTAAGTAGCGTTGAAATATTATCAATAAAAATAAAAAGTATATAACAAACAATGTTTATTGATAAGATTCTAAACAATAAAGAGTGT    | 3298 |
| Consensus     |                                                                                                        |      |
| 11S91-gBrMYB2 | .....                                                                                                  | 749  |
| 94S17-gBrmyb2 | TAAAGATTCGGCAAATAAATATTAGAAATGATCATGATACAAAATAITGCAAAGTTTTTTTTTTTTTTTGTCTAAAAGTAAATGTGTTGTGTTGATTTA    | 3398 |
| Consensus     |                                                                                                        |      |
| 11S91-gBrMYB2 | .....                                                                                                  | 749  |
| 94S17-gBrmyb2 | AAATATTGCAAAGTTGTTATGAAAAATGTAATATCTGAAGATACCATCGAAAACAITTAAACAITTAAATTTTAAACACATTTCCAACAGTTAAAAATATCA | 3498 |
| Consensus     |                                                                                                        |      |
| 11S91-gBrMYB2 | .....                                                                                                  | 749  |
| 94S17-gBrmyb2 | ATTATCTTATATATAAATGAATATGCTACGCAAAAAATGTACAATAATCTTTTTATCAGCTACAGAAAACAGTTATGAAATTTTGTAAACAACATCAA     | 3598 |
| Consensus     |                                                                                                        |      |
| 11S91-gBrMYB2 | .....                                                                                                  | 749  |
| 94S17-gBrmyb2 | ATGTATTATTAACCGAAAGTCAACATTTTATCTATTAATAAAGTATTATACATGCTTATCAACGTCCTACCACAAATTATAACTAATTAATCAAGTTGA    | 3698 |
| Consensus     |                                                                                                        |      |

|               |                                                                                                             |      |
|---------------|-------------------------------------------------------------------------------------------------------------|------|
| 11S91-gBrMYB2 | .....                                                                                                       | 749  |
| 94S17-gBrmyb2 | AGCCAATATCTAATACTCAATATTTCTTTGTTCCAAAATCTTAATAATAAAAAATGAAAAATATTAGCAAAACATTGTTTACTTTTAATTTATTTTGA          | 3798 |
| Consensus     |                                                                                                             |      |
| 11S91-gBrMYB2 | .....                                                                                                       | 749  |
| 94S17-gBrmyb2 | ATTATTTAGTATTAGTTAAGTTTATTAATAATTTAATTTGATATTGTAATTTGAATATATACAATCAAATACACATTTTTAAAAAATAGATGAAAGTA          | 3898 |
| Consensus     |                                                                                                             |      |
| 11S91-gBrMYB2 | .....                                                                                                       | 749  |
| 94S17-gBrmyb2 | TTTTTAAACACGATATGTTACCTAATAAATATGCAAAAAATCATAATGATAAATTTTTAAAAATAAAAAAGCAATTAATGTTATGTAGATTTATTA            | 3998 |
| Consensus     |                                                                                                             |      |
| 11S91-gBrMYB2 | .....                                                                                                       | 749  |
| 94S17-gBrmyb2 | TTTATTTATTTATGTCATTGAGATAAAAAATATAGCAAAAGGTGTAATAATTTTCATAATATATACTAGAAAAATTATATGCATCATTAAATATATATTA        | 4098 |
| Consensus     |                                                                                                             |      |
| 11S91-gBrMYB2 | .....                                                                                                       | 749  |
| 94S17-gBrmyb2 | AAAACTAATTTAAATTTTATAAACAATAAAATATAAATTTGAAAGTAGTTTATATAAATGAATAAAATATACAAAATTATAGTTAATTTAAATTAATAATG       | 4198 |
| Consensus     |                                                                                                             |      |
| 11S91-gBrMYB2 | .....                                                                                                       | 749  |
| 94S17-gBrmyb2 | ATATGAAAAATAAAATATGCTTTACATAATCGAACAAAGAAAAAATATAAAATAGTCTGACAACAAACAAAGATAGAAGAAATGAAATTAGTTGATTT          | 4298 |
| Consensus     |                                                                                                             |      |
| 11S91-gBrMYB2 | .....                                                                                                       | 749  |
| 94S17-gBrmyb2 | ATACGAAACAAATAAGTTAAAAATATATATACTAACATAATAAAAAATATAATACAATATTTAAAAATCACAATAATTTGATTAGAAACCTACTAAATAG        | 4398 |
| Consensus     |                                                                                                             |      |
| 11S91-gBrMYB2 | .....                                                                                                       | 749  |
| 94S17-gBrmyb2 | TAACAAAACCTGACTTGAAAGAAAAACAATTTAAAAAATAATGACCTGGATAAAAATAATCATTTTAAAAACAAAAATTTAAAAAATTTTAAATTTCCGCC       | 4498 |
| Consensus     |                                                                                                             |      |
| 11S91-gBrMYB2 | .....                                                                                                       | 823  |
| 94S17-gBrmyb2 | .....TATTGGATAATTAAACATCAAAA..TTCAATAAAACATCCTATTTTTAGGAACATATGGAGTAGGAGACGGCAAT                            | 4598 |
| Consensus     | gccccgtaggcgggtttactctagttattggataattgaaacatcaaaaatttcacgtaaaaacatcctatTTTTAGGAACATATGGAGTAGGAGACGGCAAT     |      |
| 11S91-gBrMYB2 | .....                                                                                                       | 923  |
| 94S17-gBrmyb2 | GCAGTTTTGCTCGTCTTTAATAATATTAATGTCAATTTATTGGTTTTGTAGGCTAAAATCGGTGCAGGAAGAGTTGTAGACTAAGATGGTTGAAC             | 4698 |
| Consensus     | gcagttttgctcgtctcttttaataatattaaatgtcaattattggttttgttaggtctaaaatcggtgcaggaagagttgttagactaagatggttgaacta     |      |
| 11S91-gBrMYB2 | .....                                                                                                       | 1023 |
| 94S17-gBrmyb2 | TTTGAAGCCAAGTATCAAGAGAGGAAAACTCAACTCCGATGAAGTTGATCTTCTTATCGCCTTCATAAGCTTTTAGGAAACAGGTTTACATTCCAGACA         | 4798 |
| Consensus     | tttgaagccaagtattcaagagagggaaaaactcaactccgatgaagttgatctctctatcgcttcataagcttttaggaaacaggtttacattc agaca       |      |
| 11S91-gBrMYB2 | .....                                                                                                       | 1122 |
| 94S17-gBrmyb2 | CAAATTCAACTGTATTTTCGTATCCTCATTCCGCTAATCTAATCATTTGATTTGTTTTTTTTTTGATAAAAA..TACTTAAATTTATTTTCATATGTAAT        | 4898 |
| Consensus     | caaatccaactgtatcttctgatctcctcattccggtcctaatcctaatcatttgatttggTTTTTTTTTTGATAAAAA..tacttaaatTTATTTTCATATGTAAT |      |
| 11S91-gBrMYB2 | .....                                                                                                       | 1222 |
| 94S17-gBrmyb2 | GATCCATTACTAAGTCAAATATATCCCTAATTTTTCAAATGCATGCTTAGGTGGTCTTAAATGCTGGTAGATTACCCGGTCGGACCGCCAATGACGTCA         | 4998 |
| Consensus     | gatccattactaagtcaaatatataccctaatttttcaaatgcatgcttaggtggctcttaattgctggtagattaccggctcggaccgccaatgacgtca       |      |
| 11S91-gBrMYB2 | .....                                                                                                       | 1322 |
| 94S17-gBrmyb2 | AAAATTACTGGAACACCCATTTGAGTAAGAAACATGAACCGGGTTGTAAGACCCAGATGAAAAAGAGAAACATTCCTTGCTCTTATACCACACCAGCCCA        | 5098 |
| Consensus     | aaaattactggaacacccatttgagtaagaaacatgaaccgggttgaagaccagatgaaaaagagaaacattccttgctcttataccacaccagccca          |      |
| 11S91-gBrMYB2 | .....                                                                                                       | 1422 |
| 94S17-gBrmyb2 | AAAAATCGACGTTTTCAAACCTCGACCTCGATCCTTCACCGTTAACAGCGGCTGCAGCCATAATAATGGCATGCCAGAAGCTGCATTGTTTCCTCTATGC        | 5198 |
| Consensus     | aaaaatcgacgTTTTCAAACCTCGACCTCGATCCTTCACCGTTAACAGCGGCTGCAGCCATAATAATGGCATGCCAGAAGCTGCATTGTTTCCTCTATGC        |      |
| 11S91-gBrMYB2 | .....                                                                                                       | 1522 |
| 94S17-gBrmyb2 | CTTGGACACAACGATACTAATAATGTTTCTGAAAAATAATCACATGTAACAAAGATGATGATAAATCTGAGCTTGTAGTCATTAAATGGATGGTCAGA          | 5298 |
| Consensus     | cttggacacaacgataactaataatgTTTCTGAAAAATAATCACATGTAACAAAGATGATGATAAATCTGAGCTTGTAGTCATTAAATGGATGGTCAGA         |      |
| 11S91-gBrMYB2 | .....                                                                                                       | 1622 |
| 94S17-gBrmyb2 | ATAGGTGGTGGGAAAGTTTGTAGTAGAGGCCAAGATCCAGCTGCGCTCTTTCCAGAACTACAGCAATAAAAAAGGGCGCAACCTCCCGGTTTGACGT           | 5398 |
| Consensus     | ataggtggtgggaaagtttGTAGTAGAGGCCAAGATCCAGCTGCGCTCTTTCCAGAACTACAGCAATAAAAAAGGGCGCAACCTCCCGGTTTGACGT           |      |
| 11S91-gBrMYB2 | .....                                                                                                       | 1664 |
| 94S17-gBrmyb2 | TGAGCAACTTTGGAGCCTGTGGATGGAGAAACTGGAACCTG                                                                   | 5440 |
| Consensus     | tgagcaactttggagcctgtggatggagaaactggaacttg                                                                   |      |





chr1-fu-gbMY82 4196  
13939-gbmy82 4197  
1351147-gbmy82 4197  
1551080-gbmy82 4197  
1551084-gbmy82 4197  
14938-gbMY82 749  
15891-gbMY82 749  
14938-gbMY82 749  
9572-5-gbMY82 749  
233-gbMY82 749  
2190-gbMY82 749  
2240-gbMY82 749  
Consensus

chr1-fu-gbMY82 4397  
13939-gbmy82 4397  
1351147-gbmy82 4397  
1551080-gbmy82 4397  
1551084-gbmy82 4397  
14938-gbMY82 749  
15891-gbMY82 749  
14938-gbMY82 749  
9572-5-gbMY82 749  
233-gbMY82 749  
2190-gbMY82 749  
2240-gbMY82 749  
Consensus

chr1-fu-gbMY82 4411  
13939-gbmy82 4596  
1351147-gbmy82 4596  
1551080-gbmy82 4596  
1551084-gbmy82 4596  
14938-gbMY82 821  
15891-gbMY82 821  
14938-gbMY82 821  
9572-5-gbMY82 821  
233-gbMY82 821  
2190-gbMY82 821  
2240-gbMY82 821  
Consensus

chr1-fu-gbMY82 4611  
13939-gbmy82 4796  
1351147-gbmy82 4796  
1551080-gbmy82 4796  
1551084-gbmy82 4796  
14938-gbMY82 1021  
15891-gbMY82 1021  
14938-gbMY82 1021  
9572-5-gbMY82 1021  
233-gbMY82 1021  
2190-gbMY82 1021  
2240-gbMY82 1021  
Consensus

chr1-fu-gbMY82 4810  
13939-gbmy82 4995  
1351147-gbmy82 4995  
1551080-gbmy82 4995  
1551084-gbmy82 4995  
14938-gbMY82 1219  
15891-gbMY82 1219  
14938-gbMY82 1219  
9572-5-gbMY82 1219  
233-gbMY82 1219  
2190-gbMY82 1219  
2240-gbMY82 1219  
Consensus

chr1-fu-gbMY82 5010  
13939-gbmy82 5195  
1351147-gbmy82 5195  
1551080-gbmy82 5195  
1551084-gbmy82 5195  
14938-gbMY82 1419  
15891-gbMY82 1419  
14938-gbMY82 1419  
9572-5-gbMY82 1419  
233-gbMY82 1419  
2190-gbMY82 1419  
2240-gbMY82 1419  
Consensus

chr1-fu-gbMY82 5210  
13939-gbmy82 5395  
1351147-gbmy82 5395  
1551080-gbmy82 5395  
1551084-gbmy82 5395  
14938-gbMY82 1619  
15891-gbMY82 1619  
14938-gbMY82 1619  
9572-5-gbMY82 1619  
233-gbMY82 1619  
2190-gbMY82 1619  
2240-gbMY82 1619  
Consensus

chr1-fu-gbMY82 5255  
13939-gbmy82 5440  
1351147-gbmy82 5440  
1551080-gbmy82 5440  
1551084-gbmy82 5440  
14938-gbMY82 1664  
15891-gbMY82 1664  
14938-gbMY82 1664  
9572-5-gbMY82 1664  
233-gbMY82 1664  
2190-gbMY82 1664  
2240-gbMY82 1664  
Consensus

**Figure S3** Multiple sequence alignment analysis of BrMYB2 in different Chinese cabbages.

‘11S91’ and ‘95T2-5’ had consensus BrMYB2 sequences, whereas ‘Chifu’ and ‘94S17’ had consensus BrMYB2 sequences.

|                  |                                            |     |
|------------------|--------------------------------------------|-----|
| BrMYB2-94S17.txt | MEGSSQGLKKGAWTAEEDNLLRQCIDKYGEGKWHQVPLRA   | 40  |
| BrMYB2-11S91.txt | MEGSSQGLKKGAWTAEEDNLLRQCIDKYGEGKWHQVPLRA   | 40  |
| Consensus        | meggssqglkkgawtaeednllrqcidkygegkwhqvplra  |     |
| BrMYB2-94S17.txt | GLNRCRKSCRLRWLNLIKPSIKRGKLNSEVDLLIRLHKL    | 80  |
| BrMYB2-11S91.txt | GLNRCRKSCRLRWLNLIKPSIKRGKLNSEVDLLIRLHKL    | 80  |
| Consensus        | glnrcrkscrlrwnlylkpsikrgklnsdevdllrlhkl    |     |
| BrMYB2-94S17.txt | LGNRWSLIAGRLPGRTANDVKNYWNTHLSKKHEPGCKTQM   | 120 |
| BrMYB2-11S91.txt | LGNRWSLIAGRLPGRTANDVKNYWNTHLSKKHEPGCKTQM   | 120 |
| Consensus        | lgnrwsliagrlpgrtandvknywnthlskkhepgcktqm   |     |
| BrMYB2-94S17.txt | KKRNI PCSYTTPAQKIIVFKPRPRSFTVNSGC SHNNGMPE | 160 |
| BrMYB2-11S91.txt | KKRNI PCSYTTPAQKIIVFKPRPRSFTVNSGC SHNNGMPE | 160 |
| Consensus        | kkrnipcsyttpaqkidvfkprprsftvnsgcshnngmpe   |     |
| BrMYB2-94S17.txt | ADIVPLCLGHNDTNNVSENIITCNKDDDKSELVSHLMDGQ   | 200 |
| BrMYB2-11S91.txt | ADIVPLCLGHNDTNNVSENIITCNKDDDKSELVSHLMDGQ   | 200 |
| Consensus        | aivplclghndtnnvseniitcnkdddkselvshlmdgq    |     |
| BrMYB2-94S17.txt | NRWESLLDESQDPAALFPETTAIKKGATSAFDVEQLWSL    | 240 |
| BrMYB2-11S91.txt | NRWESLLDESQDPAALFPETTAIKKGATSAFDVEQLWSL    | 240 |
| Consensus        | nrweslldesqdpaalfpettaikkgatsafdveqlwsl    |     |
| BrMYB2-94S17.txt | LDGETG                                     | 246 |
| BrMYB2-11S91.txt | LDGETG                                     | 246 |
| Consensus        | ldgetg                                     |     |

**Figure S4** Electrophoresis results of *gBrMYB2* from different phenotypes of Chinese cabbage and co-segregation analysis using markers ‘BrP1’ and ‘BrP2’ in the F<sub>2</sub> population. **a** Electrophoresis results of *gBrMYB2* from purple head Chinese cabbage ‘11S91’, and its female parent ‘94S17’ and male parent ‘95T2-5’; **b** electrophoresis results of *gBrMYB2* from different phenotypes of Chinese cabbage; **c** co-segregation analysis using marker ‘BrP1’ in the F<sub>2</sub> population; **d** co-segregation analysis using marker ‘BrP2’ in the F<sub>2</sub> population. W: white head Chinese cabbage; P: purple head Chinese cabbage; H: hybrid Chinese cabbage. M1: DL2000 Marker; M2: DL10000 Marker; M3: DL5000 Marker.



**Figure S5** Multiple sequence alignment analysis of MYBs in different *Crucifer* species. At: *Arabidopsis*; Bo: *B. oleracea*; Br: *B. rapa*; Rs: *Raphanus sativus*. Arrowheads indicate differential proteins produced by SNPs between purple head Chinese cabbage ‘11S91’ and its female parent ‘94S17’.



**Figure S6** Multiple sequence alignment analysis of MYBs in different *Solanaceae* species.

|            |                                            |     |
|------------|--------------------------------------------|-----|
| CAA        | MNTAIIAKSSGVRKGAWTEEEIFLLRKC IQNYGEGKWHIV  | 40  |
| LEANT1     | MNST.SMSSILGVRKGSWTDEEIFLLRKCIDKYGEGKWHIV  | 39  |
| NTAN2      | MNICTNKSSSGVKKGAWTEEEIVLLKKCIEKYGEGKWHQV   | 40  |
| PHAN2      | MSTS.NASTSGVRKGAWTEEEIILLRECIDKYGEGKWHIV   | 39  |
| SMMYB      | MNTA.TVAKSGVRKGAWTD.....RKCMKYG.GKWHVT     | 32  |
| Consensuum | gv kg wt c yg gkwh                         |     |
|            |                                            |     |
| CAA        | PIRAGLNRCRKSCRIRWLNLYLRFHIKRGDFGWDEIDLILR  | 80  |
| LEANT1     | PIRAGLNRCRKSCRIRWLNLYLRFHIKRGDFEQDEVDLILR  | 79  |
| NTAN2      | PLRAGLNRCRKSCRIRWLNLYLRFHIKRGDFSFLVDLILR   | 80  |
| PHAN2      | PVRAGLNRCRKSCRIRWLNLYLRFHIKRGDFSLEVDLILR   | 79  |
| SMMYB      | ..RSG.NRCRKSCR.RWN...YRHIKRGDADID.....     | 58  |
| Consensus  | r g nrcrkscr rw hikrgd d                   |     |
|            |                                            |     |
| CAA        | LHKLLGNRWSLIAGRLPGRTANDVKNYWNSHLQKKLIITAP  | 120 |
| LEANT1     | LHKLLGNRWSLIAGRLPGRTANDVKNYWNTNLLRKKINTTK  | 119 |
| NTAN2      | LHKLLGNRWSLIAGRLPGRTANDVKNYWNSHLRKKLIAPH   | 120 |
| PHAN2      | LHKLLGNRWSLIAGRLPGRTANDVKNYWNTHLRKKLIAPH   | 119 |
| SMMYB      | .IRHKNRWSIAG....RRTANDVKNYWNTHIKKTNSRMR    | 93  |
| Consensus  | gnrws rtandvknywn                          |     |
|            |                                            |     |
| CAA        | HRQE.KKYNTALKITT.KNVIKPRPRPTFSSSAKNNISWCT  | 158 |
| LEANT1     | IVPREKINNKCGEISTKIEIKKQRRKYFSSSTMKN...VT   | 156 |
| NTAN2      | DQK..ESKQKAKKIT....IEPRPRPTFSKTNT....CV    | 149 |
| PHAN2      | DQKQ.ESKKNKAVKITE.NNIIKPRPRPTFSRPAMNMF.PCW | 156 |
| SMMYB      | KHN....NAKIKNT.....IBRRITSSAKNVS...WCT     | 119 |
| Consensus  | r<br>[K/R]PRPRPTFS                         |     |
|            |                                            |     |
| CAA        | NKSTVITNTLDKD.ERDKETGINICQKLTSETSSITDDGV   | 197 |
| LEANT1     | NN....NVILDEE.EHCKE...ISE..KQTPDASMDNVD    | 186 |
| NTAN2      | KS...NTNTVDKDIEGSSEI.IRFNDNLKPTTEELTDDGI   | 185 |
| PHAN2      | NGKSCNKNTIDKN.EGDTEI.IKFSD.EKQKPEESIDDL    | 193 |
| SMMYB      | NKN...MNITNTDKINRHKIGVNTCK.KGDATSSSIDDDG   | 155 |
| Consensus  | i d                                        |     |
|            |                                            |     |
| CAA        | QWWTSLLENC.KEIEEDVAAVGIFEKKNKLVPSLLHDEIN   | 236 |
| LEANT1     | FWWINLLENCNDDIEEDEE...VVINYKTLTSLHHEEIS    | 223 |
| NTAN2      | QWADLLANN.YNNG.....IEEADNSSPTLLHEEMP       | 217 |
| PHAN2      | QWANLLANN.IEIEE.....LVSCN..SPTLLHEETA      | 223 |
| SMMYB      | VWWTSNCNIAAVSNK.....NHNNSMGNDGWLLSVD       | 187 |
| Consensus  | ww                                         |     |
|            |                                            |     |
| CAA        | SLT.....MQQGQSDGW.....DDF                  | 251 |
| LEANT1     | PFLNIGEGNSMQGQI SHENWGEFSLNLPQMGGVQNDDF    | 263 |
| NTAN2      | LLS.....                                   | 220 |
| PHAN2      | PSVNAE..SSLTQGGGSGL.....SDF                | 243 |
| SMMYB      | IDWNN.....                                 | 192 |
| Consensus  |                                            |     |
|            |                                            |     |
| CAA        | SADID.IWNLL                                | 261 |
| LEANT1     | SAEID.IWNLL                                | 273 |
| NTAN2      | .....                                      | 220 |
| PHAN2      | SVDIDDIWDLV                                | 254 |
| SMMYB      | .....                                      | 192 |
| Consensus  |                                            |     |

**Figure S7** Prediction of elements of *BrMYB2* promoter in 11S91. Sequence marked with different color was in accordance with element showing in figure statement, and figure mainly showed results at the upstream region of 1500 bp started from ATG translation start site.

```

>userseq1980 1499nt
+ CTAAGTTTGA AAATCTGCAG ATGGATGAGA ATTAATCATT TGAGGAAGCTC AGTGAAAAAC TGAGTGCAAC
- GATTCAAACT TTTAGACGTC TACCTACTCT TAATTAGTAA ACTCCTTGAG TCACCTTTTG ACTCACGTTG

+ AGCAAATGAA GCACAAACAA TGGGAAAGAC ATACAAAGAC AAAAGGCTTG GAAGAAACTT CTCAGATGTT
- TCGTTTACTT CGTGTPTGTT ACCCTTTCTG TATGTTTCTG TTTTCCGAAC CTTCTTTGAA GAGTCTACAA

+ TACCCTCAAA GTTAAATCCA AGAAGACAGC TATGGACACT GCATTAGACA CTGACACAAT GGATTTTGGT
- ATGGGAGTTT CAATTTAGGT TCTTCTGTCG ATACCTGTGA CGTAATCTGT GACTGTGTTA CCTAAAACCA

+ GAATTCACGG GTCACTTACA AGCATATGAG ATGAATGAGA AACTCAAGGA AGAACTGTCT AAAAAAATCT
- CTTAAGTGCC CAGTGAATGT TCGTATACTC TACTTACTCT TTGAGTTCCT TCTTGACAGA TTTTTTTAGA

+ GAAACTAGAA AGCAGATTCA CATGCTGAAT AGTGGAAACCA AGGATCTGGA GAAGATTCTC TCTGTTAGAA
- CTTTGATCTT TCGTCTAAGT GTACGACTTA TCACCTTGGT TCCTAGA GCTTCTTAAGAG AGACAATCTT

+ GGGTAGGCAA GTCCAACCTT GTGTCTCGGT TACAGTGGAA AACTACAGTA AAACAGAGTT TGTTCGGCT
- CCCATCCGTT CAGGPTGAAA CACAGAGCCA ATGTCACCTT TTGATGTCAT TTTGTCTCAA ACAAGGCCGA

+ AAGACTTAAG AGATTGCGTC TGATACTACA GGAAGTAAGA TATCAACCAA GATCATCTAT TGTGAAACTG
- TTCTGAATTC TCTAACGCAG ACTATGATGT CCTTCATTCT ATAGTTGGTT CTAGTAGATA ACACTTTGAC

+ AAACCAGTGA GAACTATAAT GTAGGCTACT TCTGTGGTAA ATACATGCAC ATACCAAGAT AACTTTACAA
- TTTGGTCACT CTTGATATTA CATCCGATGA AGACACCATT TATGTACGTG TATGGTTCTA TATGAATGTT

+ ATTTCAAAAA AGAATCACTT CAAGTTGAC TTTGCTTTCC AATCTTTACA GGTTTAACGT TAAATATGAA
- TAAAGTTTTT TCTTAGTGAG GTCTCAACTG AAACGAAAGG TTAGAAATGT CCAAATGCA ATTTATACTT

+ ATTTGTAGTC AAACGATTAT GATGGATTTC ATCAAATCTT ATTGTTTTAA TATCAAATGA GGTTCAAGTT
- TAAACATCAG TTTGCTAATA CTACCTAAAG TAGTTTAGAA TAACAAAATT ATAGTTTACT CCAAGTTCAA

+ ACATATTTCT GAACTGCTA GCCAAAAGTA CATACTCACA ATGTGAGACA CTTTAAATAC GGAACAATTT
- TGTATAAAGA CTTGAGGGAT CGGTTTTTCAT GTATGAGTGT TACTACTCTGT GAAATTTATG CCTTGTAA

```

```

+ GCAAAATAGT GATTTGTGTA CTCATAATTA TTGTAGCTGA TTTTGTGCTA CATACTTGTG TTGACAGAAA
- CGTTTATCA CTAAACACAT GAGTATTAAT AACATCGACT AAAAACAGAT GTATGTGAAC AACTGTCTTT

+ AACAAATACGC TACTTATCAA GTTGTGTACT CATAATCAA CCCTCTGTCCT CTCTCTCTCT CTCTCTCTCT
- TTGTTATGCG ATGAATAGTT CAACACATGA GTATGTAGTT GGGAGACAGA GAGAGAGAGA GAGAGAGAGA

+ CTCCTCTCTCT CTCCTCTCTCT CTCTCTCTCT CTCCTCTCTCT CTCCTCTCTCT CTCTCTCTCT CTCCTCTCTCT
- GAGAGAGAGA GAGAGAGAGA GAGAGAGAGA GAGAGAGAGA GAGAGAGAGA GAGAGAGAGA GAGAGAGAGA

+ CTCCTCTCTCT CTCCTCTCTCT CTATTCTGTT TTTAACTCTG GTGCATGAAG CTGTTCTCTC TTTTAATCAT
- GAGAGAGAGA GAGAGAGAGA GATAAGACAA AAATFGAGAC CACGTACTTC GACAAGAGAG AAAATTAGTA

+ ATAAACCACC TTTCCACCAA TCATTAATCG TCCTTTCTGC TAACTTTGCT AAGAGGCATG TTTTTCCTTT
- TATTTGGTGG AAAGGTGGTT AGTAATTAGC AGGAAAGACG ATTGAAACGA TTCTCCGTAC AAAAAGGAAA

+ AAAGTACTGA AAAATATGAA GAGACTAAGT GATATGCTAT GCTATGACGA AAATGGACTA AGTGCTATGA
- TTTCATGACT TTTTATACTT CTCTGATTCA CTATACGATA CGATACTGCT TTTACCTGAT TCACGATACT

+ ACCTTTCTG TATTTAGTTT GAATCAGTAG CAGAACATAA ATAACATAAT TAGCAAATTA GACACGACAA
- TGGAAAAGAC ATAAATCAA CTTAGTCATC GTCTTGATT TATTGATTTA ATCGTTTAAAT CTGTGCTGTT

+ AATGTGCTAT GAACCTTTTT TGTTTCTGCA TCGTACCCTG GAAGTGTGTA AAAAAAAGA CACGACAAA
- TTACACGATA CTTGGAAAA ACAAGCGT AGCATGGGAC CTTCAACAAT TTTTTTTTCT GTGCTGTTTT

+ ATGFGGATGT TAGACATGCA CGTCACTTCT CTTTGCCCGT CACGTGTATA AATAAAGTCC TCGAAGGATT
- TAGACCTACA ATCTGTACGT GCAGTGAAGA GAAACGGGCA GTGCACATAT TTATTTCCAGG AGCTTCCTAA

+ TGTCAAGCCA CAATAGAAAC CCTTTTCCTC AAGCCTGCCT TTACGTATAA CTTTTTAAAA TAAAATTTGG
- ACAGTTCGGT GTTATCTTTG GGAAAAGGAG TTCGGACGGA AATGCATAT GAAAAATTTT ATTTTAAACC

+ TTAGATACTT CTAAAATTAT AGCTGGTCC
- AATCTATGAA GATTTTAATA TCGACCAGG

```

|   |                                                                                     |                      |
|---|-------------------------------------------------------------------------------------|----------------------|
| + |  | 5UTR Py-rich stretch |
| + |  | ABRE                 |
| + |  | AE-box               |
| + |  | ARE                  |
| + |  | Box 4                |
| + |  | Box I                |
| + |  | CAAT-box             |
| + |  | CGTCA-motif          |
| + |  | CTAG-motif           |
| + |  | ERE                  |
| + |  | G-Box                |
| + |  | G-box                |
| + |  | GA-motif             |



**Figure S9** Results of PCR screening on T<sub>1</sub> and T<sub>3</sub> homozygous transgenic *Arabidopsis*. **a** T<sub>1</sub> CaMV35S:*cBrMYB2* lines detected by *BrMYB2* clone primer; **b** T<sub>1</sub> CaMV35S:*cBrmyb2* lines detected by *BrMYB2* clone primer; **c** T<sub>3</sub> transgenic lines detected by *BrMYB2* clone primer. M: DL2000 Marker.



**Figure S10** Identification of T<sub>1</sub> and T<sub>3</sub> homozygous transgenic *Arabidopsis* on MS solid medium containing 50mg·L<sup>-1</sup> kanamycin (Kan). **a** WT *Arabidopsis* without Kan; **b** WT *Arabidopsis* with Kan; **c** T<sub>1</sub> CaMV35S:*cBrMYB2* lines with Kan; **d** T<sub>1</sub> CaMV35S:*cBrmyb2* lines with Kan; **e-k** T<sub>3</sub> CaMV35S:*cBrMYB2* lines with Kan; **l-o** T<sub>3</sub> CaMV:*cBrmyb2* lines with Kan. Scale bar is 1.2 cm.



**Figure S11** Gene expression patterns of anthocyanin biosynthesis in T<sub>3</sub> CaMV35S:*cBrMYB2* *Arabidopsis*. **a** WT *Arabidopsis*; **b-h** seven different CaMV35S:*cBrMYB2* lines; samples were 50-day *Arabidopsis* seedlings; **i** qRT-PCR and semi-qRT-PCR analysis of *BrMYB2*, and Line06 of T<sub>3</sub> *cBrMYB2* lines served as the control. **j-ab** Expression patterns of ABGs in *Arabidopsis*, and WT *Arabidopsis* served as the control in data analysis. Values are presented as means  $\pm$  SD (n = 3). The different letters above each column are significantly different at  $p < 0.05$  by Duncan's test. The scale bar is 2 cm.



**Figure S12** Results of PCR detecting on T<sub>1</sub> and T<sub>3</sub> homozygous transgenic *Arabidopsis* using *BrMYB2* clone primer. **a** T<sub>1</sub> CaMV35S:*gBrMYB2* lines; **b** T<sub>1</sub> CaMV35S:*gBrmyb2* lines; **c** T<sub>3</sub> of CaMV35S:*gBrMYB2* transgenic *Arabidopsis*; **d** T<sub>3</sub> of CaMV35S:*gBrmyb2* transgenic *Arabidopsis*, M1: DL2000 Marker; M2: DL10000 Marker.



**Figure S13** Identification of T<sub>1</sub> and T<sub>3</sub> homozygous transgenic *Arabidopsis* on MS solid medium containing 50mg·L<sup>-1</sup> Kan. **a** WT *Arabidopsis* without Kan; **b** WT *Arabidopsis* with Kan; **c** T<sub>1</sub> CaMV35S:*gBrMYB2* lines with Kan; **d** T<sub>1</sub> CaMV35S:*gBrmyb2* lines with Kan; **e** 50-day WT *Arabidopsis*; **f** 50-day T<sub>1</sub> CaMV35S:*cBrMYB2* lines; **g** 50-day T<sub>1</sub> CaMV35S:*gBrmyb2* lines; **h** 50-day T<sub>1</sub> CaMV35S:*gBrMYB2* lines. **i-k** T<sub>3</sub> CaMV35S:*gBrMYB2* lines with Kan; **l-n** T<sub>3</sub> CaMV35S:*gBrmyb2* lines with Kan. Scale bar is 1.2 cm.



**Figure S14** Sequence alignment analysis of identified *BrMYB2* and *Brmyb2* using reverse transcription-PCR in transgenic *Arabidopsis* lines.

|               |                                                                                                          |     |
|---------------|----------------------------------------------------------------------------------------------------------|-----|
| T3-cBrmyb2-1  | ATGGAGGGTTCGTCCTCCCAAGGGTTGAAAAAGGTCATGGACTGCTGAAGAAGATAATCTCTTGAGGCAATGCATTGATAAGTATGGAGAAGGGAAATGGC    | 100 |
| T3-cBrmyb2-2  | ATGGAGGGTTCGTCCTCCCAAGGGTTGAAAAAGGTCATGGACTGCTGAAGAAGATAATCTCTTGAGGCAATGCATTGATAAGTATGGAGAAGGGAAATGGC    | 100 |
| T3-cBrmyb2-3  | ATGGAGGGTTCGTCCTCCCAAGGGTTGAAAAAGGTCATGGACTGCTGAAGAAGATAATCTCTTGAGGCAATGCATTGATAAGTATGGAGAAGGGAAATGGC    | 100 |
| T3-cBrMYB2-1  | ATGGAGGGTTCGTCCTCCCAAGGGTTGAAAAAGGTCATGGACTGCTGAAGAAGATAATCTCTTGAGGCAATGCATTGATAAGTATGGAGAAGGGAAATGGC    | 100 |
| T3-cBrMYB2-2  | ATGGAGGGTTCGTCCTCCCAAGGGTTGAAAAAGGTCATGGACTGCTGAAGAAGATAATCTCTTGAGGCAATGCATTGATAAGTATGGAGAAGGGAAATGGC    | 100 |
| T3-cBrMYB2-3  | ATGGAGGGTTCGTCCTCCCAAGGGTTGAAAAAGGTCATGGACTGCTGAAGAAGATAATCTCTTGAGGCAATGCATTGATAAGTATGGAGAAGGGAAATGGC    | 100 |
| T3-TgBrMYB2-1 | ATGGAGGGTTCGTCCTCCCAAGGGTTGAAAAAGGTCATGGACTGCTGAAGAAGATAATCTCTTGAGGCAATGCATTGATAAGTATGGAGAAGGGAAATGGC    | 100 |
| T3-TgBrMYB2-2 | ATGGAGGGTTCGTCCTCCCAAGGGTTGAAAAAGGTCATGGACTGCTGAAGAAGATAATCTCTTGAGGCAATGCATTGATAAGTATGGAGAAGGGAAATGGC    | 100 |
| T3-TgBrMYB2-3 | ATGGAGGGTTCGTCCTCCCAAGGGTTGAAAAAGGTCATGGACTGCTGAAGAAGATAATCTCTTGAGGCAATGCATTGATAAGTATGGAGAAGGGAAATGGC    | 100 |
| Consensus     | atggaggggttcgctcccaagggttgaaaaaggctcatggactgctgaagaagataatctcttgaggcaatgcattgataagtatggagaagggaaatggc    |     |
| T3-cBrmyb2-1  | ACCAAGTTCCTTTAAGAGCTGGTCTAAATCGGTGCAGGAAGAGTTGTAGACTAAGATGGTTGAACATTTTGAAGCCAAAGTATCAAGAGAGGAAAACCTCAA   | 200 |
| T3-cBrmyb2-2  | ACCAAGTTCCTTTAAGAGCTGGTCTAAATCGGTGCAGGAAGAGTTGTAGACTAAGATGGTTGAACATTTTGAAGCCAAAGTATCAAGAGAGGAAAACCTCAA   | 200 |
| T3-cBrmyb2-3  | ACCAAGTTCCTTTAAGAGCTGGTCTAAATCGGTGCAGGAAGAGTTGTAGACTAAGATGGTTGAACATTTTGAAGCCAAAGTATCAAGAGAGGAAAACCTCAA   | 200 |
| T3-cBrMYB2-1  | ACCAAGTTCCTTTAAGAGCTGGTCTAAATCGGTGCAGGAAGAGTTGTAGACTAAGATGGTTGAACATTTTGAAGCCAAAGTATCAAGAGAGGAAAACCTCAA   | 200 |
| T3-cBrMYB2-2  | ACCAAGTTCCTTTAAGAGCTGGTCTAAATCGGTGCAGGAAGAGTTGTAGACTAAGATGGTTGAACATTTTGAAGCCAAAGTATCAAGAGAGGAAAACCTCAA   | 200 |
| T3-cBrMYB2-3  | ACCAAGTTCCTTTAAGAGCTGGTCTAAATCGGTGCAGGAAGAGTTGTAGACTAAGATGGTTGAACATTTTGAAGCCAAAGTATCAAGAGAGGAAAACCTCAA   | 200 |
| T3-TgBrMYB2-1 | ACCAAGTTCCTTTAAGAGCTGGTCTAAATCGGTGCAGGAAGAGTTGTAGACTAAGATGGTTGAACATTTTGAAGCCAAAGTATCAAGAGAGGAAAACCTCAA   | 200 |
| T3-TgBrMYB2-2 | ACCAAGTTCCTTTAAGAGCTGGTCTAAATCGGTGCAGGAAGAGTTGTAGACTAAGATGGTTGAACATTTTGAAGCCAAAGTATCAAGAGAGGAAAACCTCAA   | 200 |
| T3-TgBrMYB2-3 | ACCAAGTTCCTTTAAGAGCTGGTCTAAATCGGTGCAGGAAGAGTTGTAGACTAAGATGGTTGAACATTTTGAAGCCAAAGTATCAAGAGAGGAAAACCTCAA   | 200 |
| Consensus     | accaagtctctttaagagctggctctaaatcgggtgcaggaagagttgtagactaagatggttgaacttttgaagccaaagtatcaagagagggaaaactcaa  |     |
| T3-cBrmyb2-1  | CTCCGATGAAGTTGATCTCTTATCGCCCTTCATAAGCTTTTAGGAAACAGGTGGTCTTTAATTCGTGGTAGATTACCCGGTCCGACCGCCAATGACGTC      | 300 |
| T3-cBrmyb2-2  | CTCCGATGAAGTTGATCTCTTATCGCCCTTCATAAGCTTTTAGGAAACAGGTGGTCTTTAATTCGTGGTAGATTACCCGGTCCGACCGCCAATGACGTC      | 300 |
| T3-cBrmyb2-3  | CTCCGATGAAGTTGATCTCTTATCGCCCTTCATAAGCTTTTAGGAAACAGGTGGTCTTTAATTCGTGGTAGATTACCCGGTCCGACCGCCAATGACGTC      | 300 |
| T3-cBrMYB2-1  | CTCCGATGAAGTTGATCTCTTATCGCCCTTCATAAGCTTTTAGGAAACAGGTGGTCTTTAATTCGTGGTAGATTACCCGGTCCGACCGCCAATGACGTC      | 300 |
| T3-cBrMYB2-2  | CTCCGATGAAGTTGATCTCTTATCGCCCTTCATAAGCTTTTAGGAAACAGGTGGTCTTTAATTCGTGGTAGATTACCCGGTCCGACCGCCAATGACGTC      | 300 |
| T3-cBrMYB2-3  | CTCCGATGAAGTTGATCTCTTATCGCCCTTCATAAGCTTTTAGGAAACAGGTGGTCTTTAATTCGTGGTAGATTACCCGGTCCGACCGCCAATGACGTC      | 300 |
| T3-TgBrMYB2-1 | CTCCGATGAAGTTGATCTCTTATCGCCCTTCATAAGCTTTTAGGAAACAGGTGGTCTTTAATTCGTGGTAGATTACCCGGTCCGACCGCCAATGACGTC      | 300 |
| T3-TgBrMYB2-2 | CTCCGATGAAGTTGATCTCTTATCGCCCTTCATAAGCTTTTAGGAAACAGGTGGTCTTTAATTCGTGGTAGATTACCCGGTCCGACCGCCAATGACGTC      | 300 |
| T3-TgBrMYB2-3 | CTCCGATGAAGTTGATCTCTTATCGCCCTTCATAAGCTTTTAGGAAACAGGTGGTCTTTAATTCGTGGTAGATTACCCGGTCCGACCGCCAATGACGTC      | 300 |
| Consensus     | ctccgatgaagttgatctcttattcggccttcataagcttttaggaaacaggtggctctttaattcgtggtagattaccgggtccgacccccaatgacgtc    |     |
| T3-cBrmyb2-1  | AAAAATACCTGGAACACCCATTTGAGTAAGAAACATGAACCGGGTTGTAAGACCCAGATGAAAAAGAGAAACATTCCTTGCTCTTATACCACACCAGCCC     | 400 |
| T3-cBrmyb2-2  | AAAAATACCTGGAACACCCATTTGAGTAAGAAACATGAACCGGGTTGTAAGACCCAGATGAAAAAGAGAAACATTCCTTGCTCTTATACCACACCAGCCC     | 400 |
| T3-cBrmyb2-3  | AAAAATACCTGGAACACCCATTTGAGTAAGAAACATGAACCGGGTTGTAAGACCCAGATGAAAAAGAGAAACATTCCTTGCTCTTATACCACACCAGCCC     | 400 |
| T3-cBrMYB2-1  | AAAAATACCTGGAACACCCATTTGAGTAAGAAACATGAACCGGGTTGTAAGACCCAGATGAAAAAGAGAAACATTCCTTGCTCTTATACCACACCAGCCC     | 400 |
| T3-cBrMYB2-2  | AAAAATACCTGGAACACCCATTTGAGTAAGAAACATGAACCGGGTTGTAAGACCCAGATGAAAAAGAGAAACATTCCTTGCTCTTATACCACACCAGCCC     | 400 |
| T3-cBrMYB2-3  | AAAAATACCTGGAACACCCATTTGAGTAAGAAACATGAACCGGGTTGTAAGACCCAGATGAAAAAGAGAAACATTCCTTGCTCTTATACCACACCAGCCC     | 400 |
| T3-TgBrMYB2-1 | AAAAATACCTGGAACACCCATTTGAGTAAGAAACATGAACCGGGTTGTAAGACCCAGATGAAAAAGAGAAACATTCCTTGCTCTTATACCACACCAGCCC     | 400 |
| T3-TgBrMYB2-2 | AAAAATACCTGGAACACCCATTTGAGTAAGAAACATGAACCGGGTTGTAAGACCCAGATGAAAAAGAGAAACATTCCTTGCTCTTATACCACACCAGCCC     | 400 |
| T3-TgBrMYB2-3 | AAAAATACCTGGAACACCCATTTGAGTAAGAAACATGAACCGGGTTGTAAGACCCAGATGAAAAAGAGAAACATTCCTTGCTCTTATACCACACCAGCCC     | 400 |
| Consensus     | aaaaatctggaacacccatttgagtaagaaacatgaaccgggttgtaagaccagatgaaaaagagaaacattccttgctcttataccacaccagccc        |     |
| T3-cBrmyb2-1  | AAAAATACGACGTTTTCAAACCTCGACCTCGATCCTTCACCGTTAACAGCGGCTGCAGCCATAAATGGCATGCCAGAAGCTGCATTGTTCTCTATG         | 500 |
| T3-cBrmyb2-2  | AAAAATACGACGTTTTCAAACCTCGACCTCGATCCTTCACCGTTAACAGCGGCTGCAGCCATAAATGGCATGCCAGAAGCTGCATTGTTCTCTATG         | 500 |
| T3-cBrmyb2-3  | AAAAATACGACGTTTTCAAACCTCGACCTCGATCCTTCACCGTTAACAGCGGCTGCAGCCATAAATGGCATGCCAGAAGCTGCATTGTTCTCTATG         | 500 |
| T3-cBrMYB2-1  | AAAAATACGACGTTTTCAAACCTCGACCTCGATCCTTCACCGTTAACAGCGGCTGCAGCCATAAATGGCATGCCAGAAGCTGCATTGTTCTCTATG         | 500 |
| T3-cBrMYB2-2  | AAAAATACGACGTTTTCAAACCTCGACCTCGATCCTTCACCGTTAACAGCGGCTGCAGCCATAAATGGCATGCCAGAAGCTGCATTGTTCTCTATG         | 500 |
| T3-cBrMYB2-3  | AAAAATACGACGTTTTCAAACCTCGACCTCGATCCTTCACCGTTAACAGCGGCTGCAGCCATAAATGGCATGCCAGAAGCTGCATTGTTCTCTATG         | 500 |
| T3-TgBrMYB2-1 | AAAAATACGACGTTTTCAAACCTCGACCTCGATCCTTCACCGTTAACAGCGGCTGCAGCCATAAATGGCATGCCAGAAGCTGCATTGTTCTCTATG         | 500 |
| T3-TgBrMYB2-2 | AAAAATACGACGTTTTCAAACCTCGACCTCGATCCTTCACCGTTAACAGCGGCTGCAGCCATAAATGGCATGCCAGAAGCTGCATTGTTCTCTATG         | 500 |
| T3-TgBrMYB2-3 | AAAAATACGACGTTTTCAAACCTCGACCTCGATCCTTCACCGTTAACAGCGGCTGCAGCCATAAATGGCATGCCAGAAGCTGCATTGTTCTCTATG         | 500 |
| Consensus     | aaaaatcgcagcttttcaaacctcgacctcgatccttcaccggttaacagcggtgcagccataaattggcatgccagaagctgcattgttctctatg        |     |
| T3-cBrmyb2-1  | CCTTGGACACAACGATACTAATAATGTTCTGAAAAATAAATCACATGTAACAAGATGATGATAAATCTGAGCTTGTAGTCAATTTAATGGATGGTCAG       | 600 |
| T3-cBrmyb2-2  | CCTTGGACACAACGATACTAATAATGTTCTGAAAAATAAATCACATGTAACAAGATGATGATAAATCTGAGCTTGTAGTCAATTTAATGGATGGTCAG       | 600 |
| T3-cBrmyb2-3  | CCTTGGACACAACGATACTAATAATGTTCTGAAAAATAAATCACATGTAACAAGATGATGATAAATCTGAGCTTGTAGTCAATTTAATGGATGGTCAG       | 600 |
| T3-cBrMYB2-1  | CCTTGGACACAACGATACTAATAATGTTCTGAAAAATAAATCACATGTAACAAGATGATGATAAATCTGAGCTTGTAGTCAATTTAATGGATGGTCAG       | 600 |
| T3-cBrMYB2-2  | CCTTGGACACAACGATACTAATAATGTTCTGAAAAATAAATCACATGTAACAAGATGATGATAAATCTGAGCTTGTAGTCAATTTAATGGATGGTCAG       | 600 |
| T3-cBrMYB2-3  | CCTTGGACACAACGATACTAATAATGTTCTGAAAAATAAATCACATGTAACAAGATGATGATAAATCTGAGCTTGTAGTCAATTTAATGGATGGTCAG       | 600 |
| T3-TgBrMYB2-1 | CCTTGGACACAACGATACTAATAATGTTCTGAAAAATAAATCACATGTAACAAGATGATGATAAATCTGAGCTTGTAGTCAATTTAATGGATGGTCAG       | 600 |
| T3-TgBrMYB2-2 | CCTTGGACACAACGATACTAATAATGTTCTGAAAAATAAATCACATGTAACAAGATGATGATAAATCTGAGCTTGTAGTCAATTTAATGGATGGTCAG       | 600 |
| T3-TgBrMYB2-3 | CCTTGGACACAACGATACTAATAATGTTCTGAAAAATAAATCACATGTAACAAGATGATGATAAATCTGAGCTTGTAGTCAATTTAATGGATGGTCAG       | 600 |
| Consensus     | ccttggacacaacgataactaataatgtttctgaaaaataaatacacatgtaacaagatgatgataaattctgagcttgttagtcattttaattggatggtcag |     |
| T3-cBrmyb2-1  | AATAGTGGTGGGAAAGTTGCTAGATGAGAGCCAAGATCCAGCTCGCCTCTTCCAGAAACTACAGCAATAAAAAAGGGCGCAACCTCCGCGTTTGACG        | 700 |
| T3-cBrmyb2-2  | AATAGTGGTGGGAAAGTTGCTAGATGAGAGCCAAGATCCAGCTCGCCTCTTCCAGAAACTACAGCAATAAAAAAGGGCGCAACCTCCGCGTTTGACG        | 700 |
| T3-cBrmyb2-3  | AATAGTGGTGGGAAAGTTGCTAGATGAGAGCCAAGATCCAGCTCGCCTCTTCCAGAAACTACAGCAATAAAAAAGGGCGCAACCTCCGCGTTTGACG        | 700 |
| T3-cBrMYB2-1  | AATAGTGGTGGGAAAGTTGCTAGATGAGAGCCAAGATCCAGCTCGCCTCTTCCAGAAACTACAGCAATAAAAAAGGGCGCAACCTCCGCGTTTGACG        | 700 |
| T3-cBrMYB2-2  | AATAGTGGTGGGAAAGTTGCTAGATGAGAGCCAAGATCCAGCTCGCCTCTTCCAGAAACTACAGCAATAAAAAAGGGCGCAACCTCCGCGTTTGACG        | 700 |
| T3-cBrMYB2-3  | AATAGTGGTGGGAAAGTTGCTAGATGAGAGCCAAGATCCAGCTCGCCTCTTCCAGAAACTACAGCAATAAAAAAGGGCGCAACCTCCGCGTTTGACG        | 700 |
| T3-TgBrMYB2-1 | AATAGTGGTGGGAAAGTTGCTAGATGAGAGCCAAGATCCAGCTCGCCTCTTCCAGAAACTACAGCAATAAAAAAGGGCGCAACCTCCGCGTTTGACG        | 700 |
| T3-TgBrMYB2-2 | AATAGTGGTGGGAAAGTTGCTAGATGAGAGCCAAGATCCAGCTCGCCTCTTCCAGAAACTACAGCAATAAAAAAGGGCGCAACCTCCGCGTTTGACG        | 700 |
| T3-TgBrMYB2-3 | AATAGTGGTGGGAAAGTTGCTAGATGAGAGCCAAGATCCAGCTCGCCTCTTCCAGAAACTACAGCAATAAAAAAGGGCGCAACCTCCGCGTTTGACG        | 700 |
| Consensus     | aatagtggtgggaaagtctgtagatgagagccaagatccagctcgctcttccagaaactacagcaataaaaaagggcgcaacctccgcttggacg          |     |
| T3-cBrmyb2-1  | TTGAGCAACTTTGGAGCCTGTTGGATGGAGAACTGGAACCTG                                                               | 743 |
| T3-cBrmyb2-2  | TTGAGCAACTTTGGAGCCTGTTGGATGGAGAACTGGAACCTG                                                               | 743 |
| T3-cBrmyb2-3  | TTGAGCAACTTTGGAGCCTGTTGGATGGAGAACTGGAACCTG                                                               | 743 |
| T3-cBrMYB2-1  | TTGAGCAACTTTGGAGCCTGTTGGATGGAGAACTGGAACCTG                                                               | 743 |
| T3-cBrMYB2-2  | TTGAGCAACTTTGGAGCCTGTTGGATGGAGAACTGGAACCTG                                                               | 743 |
| T3-cBrMYB2-3  | TTGAGCAACTTTGGAGCCTGTTGGATGGAGAACTGGAACCTG                                                               | 743 |
| T3-TgBrMYB2-1 | TTGAGCAACTTTGGAGCCTGTTGGATGGAGAACTGGAACCTG                                                               | 743 |
| T3-TgBrMYB2-2 | TTGAGCAACTTTGGAGCCTGTTGGATGGAGAACTGGAACCTG                                                               | 743 |
| T3-TgBrMYB2-3 | TTGAGCAACTTTGGAGCCTGTTGGATGGAGAACTGGAACCTG                                                               | 743 |
| Consensus     | ttgagcaactttggagcctgttggatggagaaactggaacttg                                                              |     |

**Table S1** Primers used in this work.

| Gene<br>/Primer<br>name | Forward Primer (5' to<br>3') | Reverse Primer (5' to<br>3') | Product<br>(bp) | Gene                                    |                              | Utilization<br>Description |
|-------------------------|------------------------------|------------------------------|-----------------|-----------------------------------------|------------------------------|----------------------------|
|                         |                              |                              |                 | Arabido<br>Num<br>ber<br>in<br>BRA<br>D | psis<br>BlastN<br>in<br>NCBI |                            |
| QJ-46                   | TGCTATCTGACTT                | ATACCTCATAACAC               | 178             | —                                       | —                            | Mapping                    |
|                         | GTGGTGTATCC                  | TGCATCCATAG                  |                 |                                         |                              |                            |
| LY-2                    | TTTATTATTGTGGA               | CTTATACAAACTTC               | 123             | —                                       | —                            | Mapping                    |
|                         | CACCAACCATC                  | TAATGGCAAAGG                 |                 |                                         |                              |                            |
| LY-3                    | TAAACCTAAAAATA               | TTAACGTGAGAGC                | 128             | —                                       | —                            | Mapping                    |
|                         | CATCTGCTTCC                  | TTGAATGC                     |                 |                                         |                              |                            |
| SSR14-36                | TGTAATCATCCATA               | GGGGGTTGTTGGCA               | 162             | —                                       | —                            | Mapping                    |
|                         | ACCATATAAGCG                 | TTTTAC                       |                 |                                         |                              |                            |
| <i>BrMYB2</i>           | ATGGAGGGTTCGTC               | TCAAGTTCAGTTT                | 1665/54         | Bra00                                   | 6390                         | Gene cloning               |
|                         | CCAAG                        | CTCCATCC                     | 41              | 4162                                    | ( <i>AtPAP</i><br>2)         |                            |
| <i>BrMYB2</i>           | GCTCTAGAATGGAG               | GGGGTACCTCAAGT               | 1681            | Bra00                                   | 6390                         | Vector                     |
|                         | GGTTCGTCCCAAG                | TCCAGTTTCTCCAT               |                 |                                         |                              | 4162                       |
|                         |                              | CC                           |                 |                                         |                              |                            |

|                 |                        |                       |         |       |                 |               |
|-----------------|------------------------|-----------------------|---------|-------|-----------------|---------------|
|                 |                        |                       |         |       | 2)              | KpnI)         |
|                 |                        |                       |         |       | AT1G6           | Vector        |
|                 |                        | <u>GGGGTACCTCAAGT</u> |         |       |                 |               |
| <i>BrMYB2</i>   | <u>CGGGATCC</u> ATGGAG | TCCAGTTTCTCCAT        | 5457    | Bra00 | 6390            | constuction   |
|                 | GGTTCGTCCCAAG          | CC                    |         | 4162  | ( <i>AtPAP</i>  | (BamHI and    |
|                 |                        |                       |         |       | 2)              | KpnI)         |
| <i>BrP1</i>     | TGGTGTACTTTGAT         | ACTGCATTCGCGTC        | 4080/30 | —     | —               | Co-separation |
|                 | CCTTCGTG               | TCCTAC                | 6       |       |                 | analysis      |
| <i>BrP2</i>     | CTTTTCTGCACGAA         | ATTCGCGTCTCCTA        | 4122/34 | —     | —               | Co-separation |
|                 | CCCG                   | CTCCATAT              | 8       |       |                 | analysis      |
|                 |                        |                       |         |       | AT5G6           |               |
| <i>BrEF-1-α</i> | ATACCAGGCTTGAG         | GCCAAAGAGGCCA         | 116     | Bra03 | 0390            | qRT-PCR       |
|                 | CATACCG                | TCAGACAA              |         | 1605  | ( <i>AtEF-1</i> |               |
|                 |                        |                       |         |       | -α)             |               |
|                 |                        |                       |         |       | AT5G0           |               |
| <i>BrF3'H</i>   | CCATCCACCAACAC         | AGCTTCTCCGGCGT        | 347     | Bra00 | 7990            | qRT-PCR       |
|                 | CACTCT                 | AACTCCTCC             |         | 9312  | ( <i>AtF3'H</i> |               |
|                 |                        |                       |         |       | )               |               |
|                 |                        |                       |         |       | AT5G4           |               |
| <i>BrDFR</i>    | GACGGCGTTTTCCA         | TCCCCAACACTCCA        | 94      | Bra02 | 2800            | qRT-PCR       |
|                 | CATAG                  | TTCAC                 |         | 7457  | ( <i>AtDFR</i>  |               |
|                 |                        |                       |         |       | )               |               |
| <i>BrANS</i>    | GAAGACGAAACCA          | TTAGCCAACCTACT        | 220     | Bra01 | AT4G2           | qRT-PCR       |
|                 | TCCCGTGAGA             | TCCATACC              |         | 3652  | 2880            |               |

|                   |                         |                       |      |       |                  |                  |              |
|-------------------|-------------------------|-----------------------|------|-------|------------------|------------------|--------------|
|                   |                         |                       |      |       |                  | ( <i>AtANS</i> ) |              |
|                   |                         |                       |      |       |                  | AT1G6            |              |
| <i>BrMYB2</i>     | AGGTGGTCTTTAAT          | TCCAAGGCATAGA         | 257  | Bra00 | 6390             | qRT-PCR          |              |
|                   | TGCT                    | GGAACAA               |      | 4162  | ( <i>AtPAP</i>   |                  |              |
|                   |                         |                       |      |       |                  | 2)               |              |
|                   |                         |                       |      |       |                  | AT4G0            |              |
| <i>BrTT8</i>      | TAGATACACACATG          | TCTTTGACATTCTC        | 168  | Bra03 | 9820             | qRT-PCR          |              |
|                   | GACATG                  | AACTCTCCACGA          |      | 7887  | ( <i>AtTT8</i> ) |                  |              |
| <i>BrMYB2-Pro</i> | TGGAACAATGGAA           | GGACCAGCTATAAT        | 2368 | —     | —                | Promoter         |              |
| moter             | AGATTGTCCAG             | TTTAGAAGTATCT         |      |       |                  | cloning          |              |
|                   |                         |                       |      |       |                  | Promoter         |              |
| <i>BrMYB2-Pro</i> | <u>CCAAGCTT</u> GGTCTT  | <u>CGGGATCC</u> GGACC | 2272 | —     | —                | cloning and      |              |
|                   | CTGAGTATAAATGA          | AGCTATAATTTTAG        |      |       |                  |                  | vector       |
|                   | GCATG                   | AAGTATCT              |      |       |                  |                  | construction |
|                   |                         |                       |      |       |                  | Promoter         |              |
| <i>BrMYB2-Pro</i> | <u>CCAAGCTT</u> GCATAA  | <u>CGGGATCC</u> GGACC | 2010 | —     | —                | cloning and      |              |
|                   | GATGAGATGGAGA           | AGCTATAATTTTAG        |      |       |                  |                  | vector       |
|                   | AACTG                   | AAGTATCT              |      |       |                  |                  | construction |
|                   |                         |                       |      |       |                  | Promoter         |              |
| <i>BrMYB2-Pro</i> | <u>CCAAGCTT</u> TCTGAAC | <u>CGGGATCC</u> GGACC | 793  | —     | —                | cloning and      |              |
|                   | TCCCTAGCCAAAAG          | AGCTATAATTTTAG        |      |       |                  |                  | vector       |
|                   | TAC                     | AAGTATCT              |      |       |                  |                  | construction |
|                   |                         |                       |      |       |                  | Promoter         |              |
| <i>BrMYB2-Pro</i> | <u>CCAAGCTT</u> AGTTGT  | <u>CGGGATCC</u> GGACC | 642  | —     | —                | Promoter         |              |

|                   |                         |                       |     |   |       |              |
|-------------------|-------------------------|-----------------------|-----|---|-------|--------------|
| 4                 | GTACTCATA CATCA         | AGCTATAA TTTTAG       |     |   |       | cloning and  |
|                   | ACCCT                   | AAGTATCT              |     |   |       | vector       |
|                   |                         |                       |     |   |       | construction |
|                   |                         |                       |     |   |       | Promoter     |
| <i>BrMYB2-Pro</i> | <u>CCAAGCTTT</u> TATTCT | <u>CGGGATCC</u> GGACC |     |   |       | cloning and  |
| 5                 | GTTTTTAACTCTGG          | AGCTATAA TTTTAG       | 498 | — | —     | vector       |
|                   | TGCATG                  | AAGTATCT              |     |   |       | construction |
| <i>AtACT2</i>     | CACTTGCACCAAGC          | GATTCCTGGACCTG        | 158 | — | AT3G1 | qRT-PCR      |
|                   | AGCATG                  | CCTCATC               |     |   | 8780  |              |
| <i>AtCHS</i>      | CGCATCACCAACAG          | TCCTCCGTCAGATG        | 101 | — | AT5G1 | qRT-PCR      |
|                   | TGAACAC                 | CATGTG                |     |   | 3930  |              |
| <i>AtCHI</i>      | CCGGTTCATCGATC          | ATCCCGGTTTCAGG        | 88  | — | AT3G5 | qRT-PCR      |
|                   | CTCTTC                  | GATACTATC             |     |   | 5120  |              |
| <i>AtF3H</i>      | CAGATCGTTGAGGC          | ACGAGTCATATCCG        | 87  | — | AT3G5 | qRT-PCR      |
|                   | TTGTGAGA                | CCACTAAGT             |     |   | 1240  |              |
| <i>AtF3'H</i>     | GCTCTCGCCGGAGT          | CCAGCGACGCCTTG        | 74  | — | AT5G0 | qRT-PCR      |
|                   | ATTCAA                  | TAAATC                |     |   | 7990  |              |
| <i>AtDFR</i>      | AACGGATGTGACGG          | TCCATTCACTGTCTG       | 93  | — | AT5G4 | qRT-PCR      |
|                   | TGTTTT                  | GCTTTA                |     |   | 2800  |              |
| <i>AtANS</i>      | CGATGAAAAGATCC          | GCCAATTTACTTCC        | 215 | — | AT4G2 | qRT-PCR      |
|                   | GTGAGA                  | ATAGCCT               |     |   | 2880  |              |
| <i>AtUGT79B1</i>  | CAACTGGTTTTCCG          | GCTTCCTCGACGGT        | 64  | — | AT5G5 | qRT-PCR      |
| ( <i>UF3GT2</i> ) | TTTCTGGTT               | TGATACAC              |     |   | 4060  |              |

|                  |                |                |     |   |       |         |
|------------------|----------------|----------------|-----|---|-------|---------|
| <i>AtUGT75C1</i> | CGAAGGCATTACCG | GCATCGTGTTCCAA | 112 | — | AT4G1 | qRT-PCR |
| (5GT)            | TCAGC          | AGCAG          |     |   | 4090  |         |
| <i>AtUGT78D2</i> | CACCGCACAATCCA | GCATTTATCTCCGT | 273 | — | AT5G1 | qRT-PCR |
| (UF3GT1)         | ACTCT          | CGCCAT         |     |   | 7050  |         |
| <i>At5MAT</i>    | AGCCACGCTCCTCC | ACGGCATCTTTGTC | 102 | — | AT3G2 | qRT-PCR |
|                  | ACTATC         | GTCAGG         |     |   | 9590  |         |
| <i>AtGST</i>     | TGGTCGAGGATCTC | TGAATTCTTCACCA | 93  | — | AT5G1 | qRT-PCR |
|                  | AAAGTG         | GCCAAA         |     |   | 7220  |         |
| <i>AtMYB11</i>   | AAGTGGAGCAGAG  | TTGTGCCCAACTGA | 219 | — | AT3G6 | qRT-PCR |
|                  | GAACCCG        | CATCCC         |     |   | 2610  |         |
| <i>AtMYB12</i>   | TGATGGGGAGTTGC | AACGACTCCACCGA | 114 | — | AT2G4 | qRT-PCR |
|                  | ATAACATA       | TGGAC          |     |   | 7460  |         |
| <i>AtMYB111</i>  | AATAACAAGACCA  | AGAAACATTGTGA  | 92  | — | AT5G4 | qRT-PCR |
|                  | AGAAGAAGAAGAA  | GGCCGTC        |     |   | 9330  |         |
| <i>AtTT8</i>     | TGAATCAACCCATA | GGGGTGTGACATG  | 102 | — | AT4G0 | qRT-PCR |
|                  | CGTTAGACA      | AGAAGTGT       |     |   | 9820  |         |
| <i>AtGL3</i>     | AGTGTTTAGCCGTT | TGTCTTCCGTAATA | 113 | — | AT5G4 | qRT-PCR |
|                  | CTCTTCTAGC     | TGTTCTGTGG     |     |   | 1315  |         |
| <i>AtEGL3</i>    | TTGGCACGACCGAA | TTGATAGTCTGATC | 100 | — | AT1G6 | qRT-PCR |
|                  | CATA           | TTGTCGATATTGT  |     |   | 3650  |         |
| <i>AtTTG1</i>    | TCCTCGAAGATTAC | CGGGAGAGGCTTA  | 72  | — | AT5G2 | qRT-PCR |
|                  | AACAACCG       | ACGGTCAT       |     |   | 4520  |         |

|              |               |                |     |   |       |         |
|--------------|---------------|----------------|-----|---|-------|---------|
| <i>AtTT2</i> | GCGAAGGCAAATG | CCAAGAAGATTATG | 160 | — | AT5G3 | qRT-PCR |
|              | GAGCACT       | GAGACGGA       |     |   | 5550  |         |

---

*Br: B. rapa; At: Arabidopsis.*

**Table S2** MYBs involved in anthocyanin biosynthesis in different species.

| <b>Species</b>                                         | <b>Gene name</b>      | <b>GenBank/Tair/BRAD ID</b> |
|--------------------------------------------------------|-----------------------|-----------------------------|
| Arabidopsis                                            | <i>ATMYB113</i>       | AT1G66370                   |
| Arabidopsis                                            | <i>ATMYB114</i>       | AT1G66380                   |
| Arabidopsis                                            | <i>AtMYB75 (PAP1)</i> | AT1G56650                   |
| Arabidopsis                                            | <i>AtMYB90 (PAP2)</i> | AT1G66390                   |
| Arabidopsis                                            | <i>AtTT2</i>          | AT5G35550                   |
| Arabidopsis                                            | <i>AtMYBL2</i>        | AT1G71030                   |
| Arabidopsis                                            | <i>AtMYB11</i>        | AT3G62610                   |
| Arabidopsis                                            | <i>AtMYB12</i>        | AT2G47460                   |
| Arabidopsis                                            | <i>AtMYB111</i>       | AT5G49330                   |
| Brassica rapa ‘Chifu’ (heading Chinese cabbage‘Chifu’) | <i>BrMYB2</i>         | Bra004162                   |
| Brassica rapa ‘Chifu’ (heading Chinese cabbage‘Chifu’) | <i>BrPAP1</i>         | Bra039763                   |
| Brassica rapa ‘Chifu’ (heading Chinese cabbage‘Chifu’) | <i>BrMYB1</i>         | Bra001917                   |
| Head Chinese cabbage Line 94S17                        | <i>BrMYB2</i>         | Bra004162                   |
| purple Chinese cabbage Line 11S/95T                    | <i>BrMYB2</i>         | Bra004162                   |
| Cauliflower                                            | <i>BoMYB1</i>         | GU219985                    |
| Cauliflower                                            | <i>BoMYB2</i>         | GU219987                    |
| Cauliflower                                            | <i>BoMYB3</i>         | GU219988                    |
| Cauliflower                                            | <i>BoMYB4</i>         | GU219989                    |
| Snapdragon                                             | <i>AmROSEA1</i>       | ABB83826                    |
| Snapdragon                                             | <i>AmROSEA2</i>       | ABB83827                    |
| Snapdragon                                             | <i>AmVENOSA</i>       | ABB83828                    |
| Sweet potato                                           | <i>IbMYB1</i>         | BAG68211                    |
| Sweet potato                                           | <i>IbMYB2-1</i>       | BAF45116                    |
| Sweet potato                                           | <i>IbMYB2-2</i>       | BAF45117                    |
| Sweet potato                                           | <i>IbMYB2-3</i>       | BAF45118                    |
| Sweet potato                                           | <i>IbMYB2-4</i>       | BAF45119                    |
| Tomato                                                 | <i>LeANT1</i>         | AAQ55181                    |
| Morning glory                                          | <i>InMYB1</i>         | BAE94389                    |

|                              |                  |            |
|------------------------------|------------------|------------|
| Morning glory                | <i>InMYB2</i>    | BAE94709   |
| Morning glory                | <i>InMYB3</i>    | BAE94710   |
| Pepper                       | <i>CaA</i>       | CAE75745   |
| Petunia                      | <i>PhAN2</i>     | AAF66727   |
| Grape                        | <i>VvMYBA1</i>   | BAD18977   |
| Grape                        | <i>VvMYBA2</i>   | BAD18978   |
| Grape                        | <i>VvMYBA3</i>   | BAD18979   |
| Grape                        | <i>VIMYBA1-1</i> | BAC07537   |
| Grape                        | <i>VIMYBA2</i>   | BAC07540   |
| Gerbera                      | <i>GMYB10</i>    | CAD87010   |
| Apple                        | <i>MdMYB1-1</i>  | ABK58136   |
| Apple                        | <i>MdMYB10</i>   | ACQ45201   |
| Apple                        | <i>MdMYBA</i>    | BAF80582   |
| Maize                        | <i>ZmP1</i>      | AAA19819   |
| Maize                        | <i>ZmC1</i>      | AAA33482   |
| Rice                         | <i>OsC1</i>      | BAD04024   |
| Black Spruce                 | <i>PmMYBF1</i>   | AAA82943   |
| Strawberry                   | <i>FaMYB1</i>    | AAK84064   |
| Oncidium Gower Ramsey        | <i>OgMYB1</i>    | ABS58501   |
| Phalaenopsis hybrid cultivar | <i>PhMyb9</i>    | ACH95795   |
| Diplacus aurantiacus         | <i>MaMYB</i>     | ACA04006   |
| Solanum melongena            | <i>SmMYB</i>     | AGK37072.1 |
| Prunus cerasifera            | <i>PcMYB10</i>   | ABX71495   |
| Prunus cerasifera            | <i>PcMYBA</i>    | ABX71495   |
| Prunus persica               | <i>PpMYB10</i>   | EU155160   |
| Nicotiana tabacum            | <i>NtAN2</i>     | ACO52470   |
| Raphanus sativus             | <i>RsMYB1</i>    | AKM95888   |

---

**Table S3** Expression patterns of ABGs in Chinese cabbage at head formation period. Seedlings of ‘94S17’ stayed at about 10 DAS were treated as the control in qRT-PCR data analysis. The means are values  $\pm$ SD. The different letters in each line are significantly different at  $p < 0.05$  by Duncan’s test.

| <i>Gene</i>                                          | BR<br>AD<br>Ge<br>ne<br>ID | 94S                    | 94S                       | 94S                                | 94S                                 | 11S                                | 11S                        | 11S                             | 11S                                  | 95T                                  | 95T                                   | 95T                                  | 95T                                 |                                 |
|------------------------------------------------------|----------------------------|------------------------|---------------------------|------------------------------------|-------------------------------------|------------------------------------|----------------------------|---------------------------------|--------------------------------------|--------------------------------------|---------------------------------------|--------------------------------------|-------------------------------------|---------------------------------|
|                                                      |                            | 17-<br>S1              | 17-S<br>2                 | 17-<br>S3                          | 17-<br>S4                           | 91-S<br>1                          | 91-<br>S2                  | 91-S<br>3                       | 91-S<br>4                            | 2-5-<br>S1                           | 2-5-<br>S2                            | 2-5-<br>S3                           | 2-5-<br>S4                          |                                 |
| <b>Structural genes</b>                              |                            |                        |                           |                                    |                                     |                                    |                            |                                 |                                      |                                      |                                       |                                      |                                     |                                 |
| <b>Biosynthetic genes in phenylpropanoid pathway</b> |                            |                        |                           |                                    |                                     |                                    |                            |                                 |                                      |                                      |                                       |                                      |                                     |                                 |
| <i>BrPAL1</i><br>.1                                  | Bra<br>005<br>221          | 0.0<br>15 $\pm$<br>0.0 | 0.22<br>2 $\pm$ 0.<br>092 | 0.3<br>04 $\pm$<br>0.0<br>70a<br>b | 0.26<br>4 $\pm$ 0<br>.061           | 0.11<br>8 $\pm$ 0.<br>006d         | 0.30<br>0 $\pm$ 0.<br>019  | 0.13<br>8 $\pm$ 0.<br>032       | 0.15<br>8 $\pm$ 0.<br>027            | 0.06<br>4 $\pm$ 0.<br>017            | 0.04<br>2 $\pm$ 0<br>.001             | 0.03<br>9 $\pm$ 0<br>.009            | 0.35<br>0 $\pm$ 0<br>.000           |                                 |
|                                                      | <i>BrPAL1</i><br>.2        | Bra<br>017<br>210      | 0.0<br>30 $\pm$<br>0.0    | 0.20<br>3 $\pm$ 0.<br>035          | 0.0<br>98 $\pm$<br>0.0<br>24c<br>de | 0.23<br>1 $\pm$ 0<br>.039          | 0.11<br>2 $\pm$ 0.<br>018c | 0.25<br>7 $\pm$ 0.<br>035       | 0.14<br>9 $\pm$ 0.<br>021            | 0.20<br>9 $\pm$ 0.<br>077            | 0.09<br>0 $\pm$ 0.<br>027             | 0.09<br>4 $\pm$ 0<br>.005            | 0.06<br>4 $\pm$ 0<br>.011           | 0.22<br>1 $\pm$ 0<br>.049       |
|                                                      |                            | <i>BrPAL2</i><br>.1    | Bra<br>006<br>985         | 0.0<br>69 $\pm$<br>0.0             | 0.38<br>8 $\pm$ 0.<br>082           | 0.3<br>09 $\pm$<br>0.0<br>93e      | 0.37<br>0 $\pm$ 0<br>.072  | 57.9<br>23 $\pm$<br>5.75<br>4cd | 200.<br>563<br>$\pm$ 56.<br>764<br>a | 120.<br>524<br>$\pm$ 36.<br>399<br>b | 100.<br>073<br>$\pm$ 36.<br>074<br>bc | 56.1<br>85 $\pm$<br>10.9<br>26c<br>d | 125.<br>179<br>$\pm$ 0.<br>000<br>b | 14.8<br>58 $\pm$<br>0.64<br>7de |
| <i>BrPAL2</i><br>.2                                  |                            |                        | Bra<br>039<br>777         | 0.0<br>17 $\pm$<br>0.0             | 0.04<br>4 $\pm$ 0.<br>010           | 0.1<br>16 $\pm$<br>0.0<br>25c<br>d | 0.29<br>3 $\pm$ 0<br>.022  | 0.06<br>1 $\pm$ 0.<br>002e      | 0.03<br>4 $\pm$ 0.<br>003            | 0.09<br>8 $\pm$ 0.<br>015            | 0.05<br>8 $\pm$ 0.<br>022             | 0.21<br>9 $\pm$ 0.<br>002            | 0.02<br>8 $\pm$ 0<br>.009           | 0.02<br>9 $\pm$ 0<br>.006       |
|                                                      | <i>BrPAL2</i><br>.3        |                        | Bra<br>003<br>126         | 0.0<br>21 $\pm$<br>0.0             | 0.01<br>3 $\pm$ 0.<br>002f          | 0.0<br>20 $\pm$<br>0.0<br>06f      | 0.31<br>0 $\pm$ 0<br>.070  | 1.09<br>7 $\pm$ 0.<br>131c      | 0.31<br>8 $\pm$ 0.<br>050            | 0.63<br>1 $\pm$ 0.<br>145            | 0.38<br>6 $\pm$ 0.<br>066             | 7.06<br>1 $\pm$ 0.<br>505            | 1.18<br>8 $\pm$ 0<br>.168           | 0.83<br>2 $\pm$ 0<br>.208       |
|                                                      |                            | <i>BrPAL3</i><br>.1    | Bra<br>028<br>793         | 2.2<br>94 $\pm$<br>0.6             | 0.12<br>5 $\pm$ 0.<br>087           | 0.2<br>59 $\pm$<br>0.0             | 0.06<br>7 $\pm$ 0<br>.005  | 5.23<br>1 $\pm$ 0.<br>686b      | 1.72<br>8 $\pm$ 0.<br>223            | 0.38<br>8 $\pm$ 0.<br>005            | 0.09<br>3 $\pm$ 0.<br>030             | 19.3<br>60 $\pm$<br>9.35             | 2.19<br>2 $\pm$ 0<br>.342           | 0.76<br>2 $\pm$ 0<br>.106       |

|                     |     |     |      |     |      |      |      |      |      |      |      |      |      |
|---------------------|-----|-----|------|-----|------|------|------|------|------|------|------|------|------|
|                     |     | 59b | b    | 48b | b    |      | b    | b    | b    | 9a   | b    | b    | b    |
| <i>BrPAL3</i><br>.2 | Bra | 0.0 | 0.01 | 0.0 | 0.02 | 0.01 | 0.01 | 0.04 | 0.07 | 0.00 | 0.01 | 0.00 | 0.00 |
|                     | 030 | 38± | 4±0. | 00± | 2±0  | 7±0. | 1±0. | 1±0. | 5±0. | 0±0. | 4±0  | 3±0  | 0±0  |
|                     | 322 | 0.0 | 001  | 0.0 | .011 | 003c | 002  | 000  | 000  | 000f | .002 | .000 | .000 |
|                     |     | 00b | d    | 00f | c    | d    | d    | b    | a    |      | d    | f    | f    |
| <i>BrPAL4</i><br>.0 | Bra | 0.2 | 0.07 | 0.1 | 0.07 |      | 0.23 | 0.20 | 0.66 | 0.18 | 0.14 | 0.05 | 0.09 |
|                     | 029 | 67± | 9±0. | 47± | 1±0  | 1.62 | 5±0. | 5±0. | 9±0. | 3±0. | 4±0  | 1±0  | 7±0  |
|                     | 831 | 0.0 | 000  | 0.0 | .009 | 3±0. | 021  | 066  | 015  | 002  | .044 | .004 | .005 |
|                     |     | 14c | c    | 00c | c    | 493a | c    | c    | b    | c    | c    | c    | c    |
| <i>BrC4H</i><br>1   | Bra | 0.3 | 0.10 | 0.2 | 0.26 |      | 1.25 | 0.54 | 0.51 | 0.01 | 0.12 | 0.01 | 0.03 |
|                     | 018 | 66± | 9±0. | 98± | 8±0  | 0.11 | 5±0. | 4±0. | 3±0. | 9±0. | 3±0  | 3±0  | 7±0  |
|                     | 311 | 0.0 | 001  | 0.0 | .061 | 9±0. | 215  | 036  | 000  | 007  | .006 | .002 | .004 |
|                     |     | 22c | d    | 23c | c    | 029d | a    | b    | b    | d    | d    | d    | d    |
| <i>BrC4H</i><br>2   | Bra | 0.0 | 0.11 | 0.8 | 2.51 | 0.15 | 0.39 | 0.58 | 0.95 | 0.09 | 0.05 | 0.06 | 0.46 |
|                     | 021 | 16± | 9±0. | 02± | 0±0  | 4±0. | 9±0. | 2±0. | 8±0. | 3±0. | 8±0  | 6±0  | 0±0  |
|                     | 636 | 0.0 | 022  | 0.0 | .692 | 045d | 087  | 161  | 036  | 000  | .012 | .014 | .142 |
|                     |     | 03e | de   | 60b | a    | e    | cde  | bcd  | b    | de   | e    | e    | cde  |
| <i>BrC4H</i><br>3   | Bra | 0.0 | 0.02 | 0.0 | 0.08 |      | 0.02 | 0.08 | 0.04 | 0.06 | 0.00 | 0.02 | 0.02 |
|                     | 021 | 32± | 3±0. | 24± | 7±0  | 0.10 | 6±0. | 5±0. | 7±0. | 0±0. | 7±0  | 6±0  | 6±0  |
|                     | 637 | 0.0 | 004  | 0.0 | .007 | 7±0. | 001  | 017  | 013  | 006  | .002 | .004 | .009 |
|                     |     | 01d | ef   | 01e | b    | 023a | def  | b    | cd   | c    | f    | def  | def  |
| <i>BrC4H</i><br>4   | Bra | 0.8 | 0.17 | 1.2 | 1.18 |      | 2.26 | 3.11 | 0.99 | 0.38 | 0.03 | 0.20 | 0.24 |
|                     | 022 | 67± | 4±0. | 05± | 3±0  | 1.12 | 8±0. | 8±0. | 5±0. | 2±0. | 9±0  | 2±0  | 2±0  |
|                     | 802 | 0.0 | 012  | 0.0 | .237 | 5±0. | 005  | 000  | 203  | 153  | .000 | .011 | .128 |
|                     |     | 42d | ef   | 00c | c    | 125c | b    | a    | cd   | e    | f    | ef   | ef   |
| <i>BrC4H</i><br>5   | Bra | 0.0 | 0.04 | 0.0 | 0.06 | 0.07 | 0.02 | 0.02 | 0.08 | 0.02 | 0.00 | 0.00 | 0.01 |
|                     | 022 | 19± | 1±0. | 31± | 1±0  | 2±0. | 5±0. | 9±0. | 9±0. | 7±0. | 7±0  | 9±0  | 4±0  |
|                     | 803 | 0.0 | 008  | 0.0 | .011 | 018a | 008  | 011  | 083  | 003  | .001 | .005 | .006 |
|                     |     | 03b | abc  | 08b | abc  | b    | bc   | bc   | a    | bc   | c    | c    | bc   |
| <i>Br4CL1</i>       | Bra | 0.0 | 1.03 | 0.3 | 0.31 |      | 0.29 | 0.95 | 0.45 | 0.22 | 0.15 | 0.11 | 0.41 |
|                     | 030 | 55± | 2±0. | 72± | 9±0  | 0.17 | 7±0. | 8±0. | 1±0. | 4±0. | 3±0  | 9±0  | 9±0  |
|                     | 429 | 0.0 | 590  | 0.0 | .077 | 5±0. | 029  | 006  | 237  | 048  | .051 | .075 | .025 |
|                     |     | 02b | a    | 95b | b    | 037b | b    | a    | b    | b    | b    | b    | b    |
| <i>Br4CL2</i><br>.1 | Bra | 0.3 | 0.00 | 0.1 | 0.00 | 3.17 | 6.24 | 74.4 | 31.8 | 4.15 | 0.69 | 0.00 | 0.00 |
|                     | 031 | 26± | 0±0. | 11± | 0±0  | 7±1. | 6±0. | 68±  | 87±  | 2±0. | 3±0  | 0±0  | 0±0  |
|                     | 262 | 0.0 | 000  | 0.0 | .000 | 252d | 360  | 4.43 | 0.73 | 733  | .113 | .000 | .000 |
|                     |     | 08e | e    | 63e | e    | e    | c    | 0a   | 9b   | cd   | e    | e    | e    |
| <i>Br4CL2</i><br>.2 | Bra | 0.2 | 0.42 | 2.2 | 1.05 |      | 0.71 | 0.99 | 1.20 | 0.22 | 0.03 | 0.05 | 0.23 |
|                     | 031 | 46± | 8±0. | 28± | 3±0  | 0.13 | 1±0. | 7±0. | 1±0. | 7±0. | 5±0  | 3±0  | 4±0  |
|                     | 263 | 0.0 | 076  | 0.5 | .219 | 9±0. | 186  | 061  | 475  | 066  | .008 | .002 | .024 |
|                     |     | 03c | cd   | 69a | b    | 012d | bc   | b    | b    | cd   | d    | d    | cd   |
| <i>Br4CL2</i>       | Bra | 0.0 | 0.00 | 0.0 | 0.01 | 0.09 | 0.01 | 0.00 | 0.01 | 0.03 | 0.00 | 0.00 | 0.00 |

|               |     |     |      |     |      |      |      |      |      |      |      |      |      |
|---------------|-----|-----|------|-----|------|------|------|------|------|------|------|------|------|
| .3            | 031 | 44± | 2±0. | 09± | 0±0  | 1±0. | 6±0. | 3±0. | 6±0. | 2±0. | 6±0  | 5±0  | 6±0  |
|               | 265 | 0.0 | 000  | 0.0 | .003 | 035a | 004  | 001  | 004  | 005  | .002 | .000 | .002 |
|               |     | 05b | d    | 01c | cd   |      | cd   | d    | cd   | bc   | d    | d    | d    |
|               |     |     |      | d   |      |      |      |      |      |      |      |      |      |
| <i>Br4CL2</i> | Bra | 0.3 | 0.36 | 0.3 | 0.43 | 0.12 | 0.36 | 0.83 | 0.73 | 0.21 | 0.14 | 0.30 | 0.23 |
| .4            | 031 | 48± | 6±0. | 08± | 6±0  | 3±0. | 6±0. | 0±0. | 4±0. | 0±0. | 3±0  | 3±0  | 2±0  |
|               | 266 | 0.0 | 303  | 0.1 | .062 | 026b | 106  | 258  | 083  | 052  | .010 | .003 | .059 |
|               |     | 14b | b    | 60b | b    |      | b    | a    | a    | b    | b    | b    | b    |
| <i>Br4CL3</i> | Bra | 0.5 | 0.03 | 0.1 | 0.06 | 4.19 | 0.06 | 0.06 | 0.06 | 0.29 | 0.12 | 0.00 | 0.03 |
|               | 004 | 42± | 5±0. | 33± | 9±0  | 4±1. | 4±0. | 8±0. | 1±0. | 5±0. | 1±0  | 5±0  | 1±0  |
|               | 109 | 0.1 | 002  | 0.0 | .013 | 065a | 003  | 013  | 008  | 052  | .046 | .000 | .006 |
|               |     | 70b | b    | 21b | b    |      | b    | b    | b    | b    | b    | b    | b    |
| <i>Br4CL4</i> | Bra | 0.0 | 0.07 | 0.0 | 0.10 | 0.09 | 0.09 | 0.21 | 0.02 | 0.03 | 0.02 | 0.00 | 0.10 |
| .1            | 001 | 17± | 0±0. | 07± | 1±0  | 6±0. | 0±0. | 7±0. | 8±0. | 6±0. | 0±0  | 8±0  | 1±0  |
|               | 819 | 0.0 | 016  | 0.0 | .005 | 038b | 022  | 083  | 001  | 010  | .001 | .006 | .045 |
|               |     | 05e | bcde | 01e | b    | c    | bcd  | a    | cde  | bcde | de   | e    | b    |
| <i>Br4CL4</i> | Bra | 0.0 | 0.02 | 0.0 | 0.03 | 0.10 | 0.13 | 0.04 | 0.01 | 0.26 | 0.09 | 0.06 | 0.01 |
| .2            | 001 | 95± | 5±0. | 04± | 6±0  | 7±0. | 1±0. | 7±0. | 7±0. | 3±0. | 1±0  | 4±0  | 2±0  |
|               | 820 | 0.0 | 000  | 0.0 | .005 | 000b | 014  | 009  | 004  | 154  | .006 | .041 | .000 |
|               |     | 20b | bc   | 01c | bc   | c    | b    | bc   | c    | a    | bc   | bc   | c    |
|               |     | c   |      |     |      |      |      |      |      |      |      |      |      |

**Early biosynthetic genes (EBGs)**

|              |     |     |      |     |      |      |      |      |      |      |      |      |      |
|--------------|-----|-----|------|-----|------|------|------|------|------|------|------|------|------|
| <i>BrCHS</i> | Bra | 3.6 | 0.99 | 1.3 | 0.32 | 39.0 | 0.17 | 0.03 | 0.99 | 17.7 | 1.28 | 0.20 | 0.13 |
| 1            | 008 | 54± | 7±0. | 06± | 0±0  | 25±  | 0±0. | 1±0. | 4±0. | 35±  | 3±0  | 9±0  | 3±0  |
|              | 792 | 0.5 | 781  | 0.2 | .041 | 16.0 | 015  | 007  | 022  | 6.50 | .012 | .041 | .000 |
|              |     | 19c | c    | 85c | c    | 85a  | c    | c    | c    | 4b   | c    | c    | c    |
| <i>BrCHS</i> | Bra | 4.0 | 1.16 | 4.5 | 0.45 | 93.3 | 0.58 | 0.18 | 6.47 | 122. | 14.8 | 5.83 | 2.09 |
| 2            | 006 | 46± | 6±0. | 15± | 2±0  | 22±  | 2±0. | 4±0. | 6±1. | 949  | 90±  | 9±2  | 4±0  |
|              | 224 | 0.5 | 299  | 0.0 | .138 | 26.3 | 060  | 093  | 354  | ±27. | 4.81 | .141 | .000 |
|              |     | 65c | c    | 97c | c    | 01b  | c    | c    | c    | 149  | a    | 3c   | c    |
| <i>BrCHS</i> | Bra | 3.5 | 0.17 | 0.3 | 0.25 | 29.9 | 1.61 | 0.41 | 1.56 | 8.17 | 4.26 | 2.32 | 0.33 |
| 3            | 023 | 98± | 7±0. | 71± | 3±0  | 45±  | 9±0. | 4±0. | 1±0. | 9±1. | 7±1  | 8±0  | 8±0  |
|              | 441 | 0.3 | 044  | 0.0 | .042 | 0.00 | 014  | 018  | 765  | 301  | .136 | .531 | .010 |
|              |     | 13c | g    | 46e | fg   | 0a   | de   | efg  | def  | b    | c    | d    | efg  |
| <i>BrCHS</i> | Bra | 0.6 | 0.22 | 0.2 | 0.05 | 35.2 | 0.98 | 0.07 | 0.23 | 14.5 | 4.68 | 0.74 | 0.27 |
| 4            | 036 | 99± | 3±0. | 37± | 1±0  | 08±  | 1±0. | 2±0. | 5±0. | 27±  | 4±0  | 1±0  | 3±0  |
|              | 307 | 0.0 | 055  | 0.0 | .019 | 14.2 | 332  | 008  | 038  | 3.26 | .784 | .049 | .205 |
|              |     | 12c | c    | 15c | c    | 13a  | c    | c    | c    | 7b   | c    | c    | c    |
| <i>BrCHS</i> | Bra | 0.1 | 0.00 | 0.0 | 0.00 | 0.12 | 0.24 | 4.65 | 0.74 | 0.10 | 0.00 | 0.00 | 0.00 |
| 5            | 020 | 75± | 0±0. | 00± | 0±0  | 7±0. | 0±0. | 3±0. | 6±0. | 6±0. | 0±0  | 0±0  | 0±0  |
|              | 688 | 0.0 | 000  | 0.0 | .000 | 000c | 031  | 568  | 000  | 013  | .000 | .000 | .000 |
|              |     | 00c | c    | 00c | c    |      | c    | a    | b    | c    | c    | c    | c    |

|                     |     |     |      |     |      |                      |      |      |      |      |      |      |      |
|---------------------|-----|-----|------|-----|------|----------------------|------|------|------|------|------|------|------|
| <i>BrCHI1</i>       | Bra | 0.3 | 0.13 | 0.1 | 0.14 | 1.43<br>9±0.<br>194a | 0.26 | 0.54 | 0.18 | 1.15 | 0.31 | 0.08 | 0.11 |
|                     | 007 | 45± | 5±0. | 05± | 1±0  |                      | 6±0. | 0±0. | 8±0. | 4±0. | 8±0  | 9±0  | 8±0  |
|                     | 142 | 0.0 | 024  | 0.0 | .020 |                      | 036  | 138  | 008  | 181  | .021 | .014 | .019 |
|                     |     | 60d | ef   | 19f | def  |                      | def  | c    | def  | b    | de   | f    | ef   |
| <i>BrCHI2</i>       | Bra | 0.4 | 0.33 | 0.7 | 0.38 | 1.11<br>1±0.<br>066b | 0.32 | 1.06 | 0.89 | 1.91 | 0.62 | 0.72 | 0.81 |
|                     | 003 | 07± | 7±0. | 52± | 9±0  |                      | 7±0. | 1±0. | 4±0. | 0±0. | 2±0  | 9±0  | 1±0  |
|                     | 209 | 0.0 | 050  | 0.1 | .047 |                      | 018  | 762  | 105  | 160  | .087 | .260 | .133 |
|                     |     | 59c | c    | c   | c    |                      | c    | b    | bc   | a    | bc   | bc   | bc   |
| <i>BrCHI3</i>       | Bra | 0.2 | 0.09 | 0.1 | 0.34 | 16.4                 | 0.21 | 0.29 | 0.90 | 3.05 | 0.16 | 0.03 | 0.07 |
|                     | 017 | 79± | 9±0. | 22± | 1±0  | 34±                  | 9±0. | 2±0. | 7±0. | 0±0. | 6±0  | 5±0  | 7±0  |
|                     | 728 | 0.0 | 005  | 0.0 | .101 | 7.08                 | 067  | 003  | 191  | 953  | .082 | .011 | .012 |
|                     |     | 79b | b    | 11b | b    | 5a                   | b    | b    | b    | b    | b    | b    | b    |
| <i>BrF3H1</i>       | Bra | 0.3 | 0.60 | 1.2 | 1.06 | 4.73                 | 3.25 | 20.9 | 0.71 | 5.93 | 2.92 | 1.65 | 0.49 |
|                     | 036 | 74± | 9±0. | 85± | 2±0  | 9±1.                 | 1±0. | 98±  | 4±0. | 3±2. | 2±0  | 3±0  | 1±0  |
|                     | 828 | 0.0 | 054  | 0.0 | .345 | 952b                 | 117  | 1.78 | 025  | 174  | .062 | .329 | .155 |
|                     |     | 29f | ef   | 80d | def  | c                    | cd   | 6a   | ef   | b    | cde  | def  | f    |
| <i>BrF3H2</i>       | Bra | 0.0 | 0.03 | 0.0 | 0.00 | 0.01                 | 0.02 | 0.00 | 0.03 | 0.00 | 0.10 | 0.00 | 0.00 |
|                     | 029 | 02± | 9±0. | 00± | 0±0  | 9±0.                 | 3±0. | 0±0. | 2±0. | 0±0. | 6±0  | 0±0  | 0±0  |
|                     | 996 | 0.0 | 000  | 0.0 | .000 | 001d                 | 003  | 000  | 007  | 000  | .000 | .000 | .000 |
|                     |     | 00e | b    | 00e | e    |                      | d    | e    | c    | e    | a    | e    | e    |
| <i>BrF3H3</i>       | Bra | 5.6 | 2.32 | 3.5 | 1.19 | 51.0                 | 7.30 | 2.56 | 7.67 | 190. | 14.2 | 4.17 | 2.74 |
|                     | 012 | 53± | 6±0. | 70± | 6±0  | 27±                  | 7±2. | 3±0. | 2±1. | 193  | 45±  | 9±0  | 2±0  |
|                     | 862 | 0.1 | 149  | 0.2 | .057 | 4.69                 | 137  | 845  | 193  | ±80. | 3.24 | .649 | .536 |
|                     |     | 35b | b    | 37b | b    | 0b                   | b    | b    | b    | 306  | 6b   | b    | b    |
| <i>BrF3'H</i>       | Bra | 8.2 | 0.97 | 3.3 | 0.45 | 108.                 | 2.86 | 0.42 | 3.25 | 273. | 36.1 | 36.3 | 61.4 |
|                     | 009 | 41± | 2±0. | 74± | 5±0  | 815                  | 5±1. | 4±0. | 2±1. | 828  | 95±  | 35±  | 97±  |
|                     | 312 | 0.0 | 253  | 0.4 | .175 | ±48.                 | 266  | 016  | 618  | ±63. | 4.70 | 21.9 | 57.9 |
|                     |     | 00c | c    | 68c | c    | 826b                 | c    | c    | c    | 758  | 1c   | 72c  | 56b  |
| <i>BrFLS1</i>       | Bra | 0.7 | 0.65 | 2.9 | 2.45 | 0.50                 | 0.31 | 0.10 | 6.19 | 0.69 | 0.98 | 0.09 | 0.26 |
|                     | 009 | 93± | 8±0. | 66± | 1±0  | 1±0.                 | 4±0. | 9±0. | 9±1. | 8±0. | 9±0  | 5±0  | 6±0  |
|                     | 358 | 0.0 | 165  | 0.2 | .338 | 123c                 | 003  | 011  | 146  | 101  | .200 | .017 | .004 |
|                     |     | 18c | cd   | 74b | b    | d                    | cd   | d    | a    | cd   | c    | d    | cd   |
| <i>BrFLS2</i>       | Bra | 0.0 | 0.20 | 0.1 | 0.53 | 0.02                 | 0.05 | 0.00 | 0.13 | 0.00 | 0.01 | 0.00 | 0.19 |
|                     | 038 | 24± | 6±0. | 93± | 5±0  | 3±0.                 | 4±0. | 3±0. | 6±0. | 7±0. | 7±0  | 0±0  | 9±0  |
|                     | 647 | 0.0 | 050  | 0.0 | .036 | 002d                 | 001  | 001  | 006  | 001  | .005 | .000 | .007 |
|                     |     | 08d | b    | 53b | a    |                      | d    | d    | c    | d    | d    | d    | b    |
| <i>BrFLS3</i><br>.1 | Bra | 0.0 | 0.03 | 0.0 | 0.09 | 0.01                 | 0.00 | 0.00 | 0.03 | 0.00 | 0.00 | 0.00 | 0.00 |
|                     | 038 | 15± | 2±0. | 37± | 1±0  | 4±0.                 | 4±0. | 6±0. | 1±0. | 5±0. | 9±0  | 1±0  | 9±0  |
|                     | 648 | 0.0 | 003  | 0.0 | .019 | 000c                 | 001  | 001  | 004  | 001  | .002 | .000 | .002 |
|                     |     | 01c | b    | 00b | a    | d                    | cd   | cd   | b    | cd   | cd   | d    | cd   |
| <i>BrFLS3</i>       | Bra | 0.0 | 0.10 | 0.0 | 0.03 | 0.00                 | 0.00 | 0.00 | 0.00 | 0.01 | 0.00 | 0.00 | 0.01 |

|               |     |     |      |     |      |      |      |      |      |      |      |      |      |
|---------------|-----|-----|------|-----|------|------|------|------|------|------|------|------|------|
| .2            | 029 | 12± | 9±0. | 06± | 1±0  | 4±0. | 1±0. | 1±0. | 1±0. | 2±0. | 1±0  | 2±0  | 4±0  |
|               | 211 | 0.0 | 032  | 0.0 | .004 | 000c | 000  | 000  | 000  | 003  | .000 | .000 | .000 |
|               |     | 06b | a    | 00c | b    |      | c    | c    | c    | bc   | c    | c    | bc   |
|               |     | c   |      |     |      |      |      |      |      |      |      |      |      |
|               |     | 0.0 | 0.17 | 0.0 | 0.05 | 0.00 | 0.00 | 0.00 | 0.00 | 0.01 | 0.00 | 0.00 | 0.07 |
| <i>BrFLS3</i> | Bra | 12± | 9±0. | 07± | 9±0  | 4±0. | 2±0. | 0±0. | 3±0. | 4±0. | 3±0  | 6±0  | 3±0  |
| .3            | 029 | 0.0 | 031  | 0.0 | .006 | 000c | 001  | 000  | 003  | 003  | .002 | .004 | .007 |
|               | 212 | 03c | a    | 01c | b    |      | c    | c    | c    | c    | c    | c    | b    |
|               |     | 0.0 | 0.01 | 0.0 | 0.01 | 0.00 | 0.00 | 0.00 | 0.00 | 0.00 | 0.01 | 0.04 | 0.32 |
| <i>BrFLS4</i> | Bra | 00± | 6±0. | 00± | 0±0  | 3±0. | 0±0. | 5±0. | 0±0. | 1±0. | 8±0  | 8±0  | 7±0  |
|               | 037 | 0.0 | 005  | 0.0 | .009 | 000f | 000f | 000  | 000f | 000f | .003 | .004 | .000 |
|               | 747 | 00f | cd   | 00f | de   |      |      | ef   |      |      | c    | b    | a    |

**Late biosynthetic genes (LBGs)**

|               |     |     |      |     |      |      |      |      |      |      |      |      |      |
|---------------|-----|-----|------|-----|------|------|------|------|------|------|------|------|------|
|               |     |     |      |     |      | 2021 |      |      |      | 944. | 106. | 124. |      |
| <i>BrDFR1</i> | Bra | 3.9 | 13.0 | 9.5 | 2.17 | .244 | 21.7 | 6.59 | 39.8 | 330  | 889  | 764  | 67.9 |
|               | 027 | 61± | 35±  | 30± | 2±0  | ±26  | 16±  | 8±0. | 30±  | ±97. | ±12  | ±19  | 12±  |
|               | 457 | 0.0 | 2.14 | 1.1 | .075 | 6.15 | 0.00 | 807  | 1.20 | 640  | .138 | .294 | 15.9 |
|               |     | 00c | 3c   | 99c | c    | 2a   | 0c   | c    | 9c   | b    | c    | c    | 47c  |
|               |     | 0.0 | 0.03 | 0.0 | 0.00 | 0.00 | 0.00 | 0.00 | 0.00 | 0.04 | 0.00 | 0.00 | 0.00 |
| <i>BrDFR2</i> | Bra | 11± | 4±0. | 00± | 0±0  | 0±0. | 0±0. | 0±0. | 0±0. | 9±0. | 0±0  | 0±0  | 0±0  |
|               | 019 | 0.0 | 000  | 0.0 | .000 | 000d | 000  | 000  | 000  | 009  | .000 | .000 | .000 |
|               | 062 | 00c | b    | 00d | d    |      | d    | d    | d    | a    | d    | d    | d    |
|               |     | 0.5 | 0.00 | 0.1 | 0.71 | 41.0 | 1.71 | 1.31 | 0.77 | 257. | 0.01 | 0.00 | 6.36 |
| <i>BrDFR3</i> | Bra | 10± | 0±0. | 43± | 6±0  | 15±  | 4±0. | 1±0. | 5±0. | 521  | 6±0  | 0±0  | 8±0  |
|               | 010 | 0.0 | 000  | 0.0 | .000 | 8.07 | 000  | 000  | 000  | ±26. | .000 | .000 | .000 |
|               | 535 | 00c | c    | 20c | c    | 7b   | c    | c    | c    | 682  | c    | c    | c    |
|               |     |     |      |     |      |      |      |      |      | a    |      |      |      |
|               |     | 1.2 | 1.28 | 0.8 | 3.11 | 1085 | 369. | 478. | 111. | 155  | 571. | 107. | 85.5 |
| <i>BrANS1</i> | Bra | 93± | 5±0. | 18± | 4±0  | .657 | 451  | 581  | 382  | 4.46 | 825  | 177  | 84±  |
|               | 013 | 0.0 | 049  | 0.0 | .357 | ±33  | ±36. | ±7.7 | ±52. | 6±4  | ±23  | ±15  | 8.24 |
|               | 652 | 43d | d    | 01d | d    | 2.50 | 281  | 52c  | 942  | 3.86 | .648 | .729 | 8d   |
|               |     |     |      |     |      | 4b   | c    |      | d    | 1a   | c    | d    |      |
|               |     | 0.1 | 0.02 | 0.2 | 1.02 | 2.47 | 0.06 | 0.01 | 0.08 | 7.66 | 0.68 | 0.01 | 0.40 |
| <i>BrANS2</i> | Bra | 69± | 5±0. | 40± | 6±0  | 7±0. | 2±0. | 6±0. | 4±0. | 4±0. | 6±0  | 0±0  | 4±0  |
|               | 019 | 0.0 | 009  | 0.0 | .063 | 098b | 023  | 002  | 004  | 685  | .174 | .000 | .000 |
|               | 350 | 33e | e    | 29d | c    |      | e    | e    | e    | a    | cd   | e    | de   |
|               |     | 0.0 | 0.00 | 0.0 | 0.00 | 0.41 | 0.00 | 3.80 | 0.08 | 0.02 | 0.00 | 0.00 | 0.00 |
| <i>BrANS3</i> | Bra | 00± | 0±0. | 00± | 0±0  | 0±0. | 0±0. | 9±0. | 8±0. | 7±0. | 0±0  | 0±0  | 0±0  |
|               | 017 | 0.0 | 000  | 0.0 | .000 | 483b | 000  | 000  | 006  | 000  | .000 | .000 | .000 |
|               | 132 | 00c | c    | 00c | c    |      | c    | a    | c    | c    | c    | c    | c    |
| <i>BrANS4</i> | Bra | 0.0 | 0.00 | 0.4 | 4.65 | 0.06 | 0.00 | 0.00 | 1.75 | 1.13 | 0.08 | 3.37 | 0.00 |

|               |     |     |      |     |      |      |      |      |      |      |      |      |      |
|---------------|-----|-----|------|-----|------|------|------|------|------|------|------|------|------|
|               | 000 | 00± | 0±0. | 55± | 4±0  | 5±0. | 0±0. | 0±0. | 3±0. | 2±0. | 9±0  | 3±0  | 0±0  |
|               | 045 | 0.0 | 000f | 0.0 | .000 | 000f | 000f | 000f | 000  | 009  | .000 | .174 | .000 |
|               |     | 00f |      | 09e | a    |      |      |      | c    | d    | f    | b    | f    |
|               |     | 0.7 |      | 0.3 | 0.49 |      | 1.26 | 2.60 | 0.82 | 2.47 | 0.31 | 0.26 | 0.27 |
| <i>BrUF3</i>  | Bra | 68± | 0.37 | 73± | 6±0  | 1.07 | 4±0. | 3±0. | 9±0. | 7±0. | 5±0  | 7±0  | 8±0  |
| <i>GT1(Br</i> | 023 | 0.0 | 1±0. | 0.0 | .123 | 8±0. | 359  | 507  | 073  | 372  | .043 | .086 | .026 |
| <i>UGT78</i>  | 594 | 83b | 021  | 14c | cd   | 182b | b    | a    | bc   | a    | cd   | d    | d    |
| <i>D2()</i>   |     | cd  | cd   | d   | cd   |      |      |      |      |      |      |      |      |
| <i>BrUF3</i>  | Bra | 0.1 | 0.09 | 0.1 | 0.61 | 51.4 | 1.29 | 0.90 | 9.14 | 324. | 92.9 | 9.26 | 12.6 |
| <i>GT2(Br</i> | 003 | 70± | 6±0. | 86± | 3±0  | 96±  | 5±0. | 0±0. | 1±0. | 920  | 31±  | 9±0  | 67±  |
| <i>UGT79</i>  | 021 | 0.0 | 005  | 0.0 | .209 | 4.89 | 103  | 145  | 714  | ±1.3 | 15.1 | .559 | 1.27 |
| <i>B1)</i>    |     | 41e | e    | 73e | e    | 3c   | e    | e    | de   | 23a  | 94b  | de   | 3d   |
| <i>BrUF5</i>  | Bra | 0.2 | 0.01 | 0.0 | 0.13 |      | 0.28 | 0.43 | 0.29 | 5.40 | 2.81 | 1.73 | 0.03 |
| <i>GT(BrU</i> | 038 | 58± | 6±0. | 34± | 4±0  | 5.34 | 6±0. | 2±0. | 1±0. | 5±0. | 9±0  | 6±0  | 3±0  |
| <i>GT75C</i>  | 445 | 0.1 | 005  | 0.0 | .038 | 6±0. | 012  | 066  | 070  | 896  | .815 | .074 | .004 |
| <i>I()</i>    |     | 33d | d    | 10d | d    | 529a | d    | d    | d    | a    | b    | c    | d    |
|               |     | 0.1 | 1.18 | 0.2 | 0.26 | 143. | 5.32 | 4.78 | 1.22 | 364. | 31.2 | 8.20 | 2.59 |
| <i>Br5MA</i>  | Bra | 23± | 7±0. | 02± | 3±0  | 840  | 4±0. | 1±1. | 9±0. | 403  | 50±  | 0±1  | 9±0  |
| <i>T</i>      | 036 | 0.0 | 280  | 0.0 | .082 | ±36. | 210  | 061  | 227  | ±12  | 5.64 | .045 | .536 |
|               | 208 | 52c | c    | 10c | c    | 711b | 0.00 | c    | c    | 2.97 | 7c   | c    | c    |
|               |     |     |      |     |      |      | 0    |      |      | 219. |      |      |      |
| <i>Brp-Co</i> | Bra | 0.1 | 5.05 | 0.7 | 0.52 | 162. | 4.37 | 1.53 | 0.87 | 722  | 89.7 | 7.88 | 1.94 |
| <i>uT</i>     | 030 | 94± | 1±0. | 14± | 3±0  | 091  | 3±0. | 3±0. | 3±0. | ±16. | 86±  | 6±1  | 4±0  |
|               | 550 | 0.0 | 819  | 0.0 | .123 | ±13. | 555  | 492  | 042  | 682  | 38.0 | .751 | .252 |
|               |     | 09d | d    | 44d | d    | 643b | d    | d    | d    | a    | 38c  | d    | d    |
|               |     |     |      |     |      |      |      |      |      |      |      |      |      |
| <i>BrSAT</i>  | Bra | 33. | 56.6 | 5.3 | 1.66 | 24.5 | 38.0 | 74.7 | 4.16 | 5.95 | 4.18 | 0.65 | 0.31 |
|               | 012 | ±2. | 54±  | 67± | 9±0  | 07±  | 01±  | 21±  | 4±0. | 5±0. | 5±0  | 1±0  | 7±0  |
|               | 153 | 764 | 2.32 | 0.3 | .439 | 2.52 | 10.2 | 8.57 | 994  | 380  | .051 | .318 | .021 |
|               |     | c   | 3b   | 51e | e    | 9d   | 68c  | 0a   | e    | e    | e    | e    | e    |
|               |     |     |      |     |      |      |      |      |      |      |      |      |      |
| <i>BrUGT</i>  | Bra | 0.0 | 0.16 | 0.0 | 0.01 | 0.08 | 0.04 | 0.30 | 0.00 | 0.74 | 0.36 | 0.00 | 0.00 |
| <i>84A1.1</i> | 039 | 23± | 5±0. | 73± | 5±0  | 4±0. | 6±0. | 0±0. | 0±0. | 6±0. | 3±0  | 0±0  | 0±0  |
|               | 547 | 0.0 | 036  | 0.0 | .001 | 034c | 004  | 047  | 000  | 110  | .081 | .000 | .000 |
|               |     | 04d | c    | 06c | d    | d    | d    | b    | d    | a    | b    | d    | d    |
|               |     |     |      |     |      |      |      |      |      |      |      |      |      |
| <i>BrUGT</i>  | Bra | 0.1 | 0.07 | 21. | 9.48 | 0.19 | 0.17 | 0.82 | 4.52 | 3.33 | 11.5 | 4.82 | 1.49 |
| <i>84A1.2</i> | 012 | 78± | 0±0. | 587 | 7±0  | 2±0. | 2±0. | 8±0. | 5±0. | 2±0. | 11±  | 1±0  | 8±0  |
|               | 784 | 0.0 | 005  | ±1. | .338 | 061g | 000  | 347f | 085  | 859  | 1.05 | .189 | .078 |
|               |     | 21g | g    | 288 | c    |      | g    | g    | d    | e    | 4b   | d    | f    |
|               |     |     |      | a   |      |      |      |      |      |      |      |      |      |
| <i>BrUGT</i>  | Bra | 0.4 | 0.20 | 0.9 | 0.15 | 1.04 | 0.24 | 2.45 | 1.22 | 0.25 | 0.26 | 0.00 | 0.00 |
| <i>84A2.1</i> | 031 | 88± | 3±0. | 19± | 6±0  | 8±0. | 0±0. | 8±0. | 7±0. | 7±0. | 6±0  | 0±0  | 0±0  |
|               | 290 | 0.0 | 022  | 0.0 | .003 | 380b | 075  | 000  | 130  | 038  | .007 | .000 | .000 |
|               |     | 49d | e    | 51c | e    | c    | de   | a    | b    | de   | de   | e    | e    |
| <i>BrUGT</i>  | Bra | 0.3 | 0.42 | 8.4 | 1.12 | 8.82 | 0.72 | 1.58 | 13.6 | 2.05 | 2.08 | 0.46 | 0.35 |



|               |     |     |      |     |      |      |      |      |      |      |      |      |      |
|---------------|-----|-----|------|-----|------|------|------|------|------|------|------|------|------|
| <i>BrMYB2</i> | Bra | 0.6 | 2.88 | 0.5 | 0.31 | 24.1 | 1.90 | 1.20 | 1.59 | 37.7 | 0.88 | 0.92 | 1.84 |
|               | 004 | 93± | 5±1. | 15± | 4±0  | 64±  | 8±0. | 5±0. | 9±0. | 49±  | 6±0  | 0±0  | 1±0  |
|               | 162 | 0.4 | 102  | 0.1 | .057 | 1.46 | 182  | 103  | 326  | 4.35 | .220 | .414 | .619 |
|               |     | 58c | c    | 28c | c    | 9b   | c    | c    | c    | 6a   | c    | c    | c    |
| <i>BrPAP1</i> | Bra | 1.7 | 1.06 | 0.7 | 1.06 | 0.67 | 1.90 | 4.35 | 2.20 | 0.02 | 0.60 | 0.53 | 1.26 |
|               | 039 | 58± | 4±0. | 07± | 2±0  | 5±0. | 4±0. | 0±1. | 5±0. | 6±0. | 7±0  | 1±0  | 0±0  |
|               | 763 | 0.3 | 000  | 0.2 | .633 | 000c | 542  | 604  | 494  | 006  | .090 | .337 | .006 |
|               |     | 11b | bcde | 15c | bcd  | de   | bc   | a    | b    | e    | cde  | de   | bcd  |
| <i>BrTT2</i>  | Bra | 0.0 | 1.74 | 0.2 | 0.33 | 0.07 | 0.20 | 0.00 | 0.33 | 0.07 | 0.06 | 0.00 | 0.00 |
|               | 035 | 54± | 4±0. | 12± | 6±0  | 9±0. | 3±0. | 0±0. | 7±0. | 8±0. | 0±0  | 0±0  | 0±0  |
|               | 532 | 0.0 | 000  | 0.0 | .005 | 008d | 058  | 000  | 142  | 010  | .000 | .000 | .000 |
|               |     | 13d | a    | 77c | b    |      | c    | d    | b    | d    | d    | d    | d    |

**bHLH  
regulatory  
genes**

|                 |     |     |      |     |      |      |      |      |      |      |      |      |      |
|-----------------|-----|-----|------|-----|------|------|------|------|------|------|------|------|------|
| <i>BrTT8</i>    | Bra | 1.7 | 2.58 | 0.5 | 0.22 | 14.1 | 1.87 | 1.40 | 1.44 | 10.5 | 2.33 | 0.34 | 0.69 |
|                 | 037 | 17± | 4±0. | 11± | 1±0  | 22±  | 7±1. | 6±0. | 2±0. | 80±  | 1±0  | 5±0  | 7±0  |
|                 | 887 | 0.4 | 745  | 0.0 | .086 | 1.83 | 028  | 632  | 112  | 3.20 | .472 | .086 | .009 |
| <i>BrEGL3-1</i> | Bra | 1.3 | 0.03 | 0.0 | 0.00 | 0.30 | 0.02 | 0.00 | 0.00 | 0.86 | 0.10 | 0.00 | 0.00 |
|                 | 027 | 21± | 7±0. | 03± | 0±0  | 0±0. | 9±0. | 0±0. | 0±0. | 3±0. | 1±0  | 0±0  | 0±0  |
|                 | 653 | 0.1 | 004  | 0.0 | .000 | 085c | 002  | 000  | 000  | 228  | .020 | .000 | .000 |
| <i>BrEGL3-2</i> | Bra | 0.9 | 0.71 | 0.9 | 1.20 | 0.40 | 0.84 | 0.71 | 5.41 | 0.62 | 1.22 | 0.33 | 2.35 |
|                 | 027 | 75± | 0±0. | 42± | 6±0  | 9±0. | 9±0. | 2±0. | 8±1. | 2±0. | 6±0  | 3±0  | 5±0  |
|                 | 796 | 0.4 | 222  | 0.0 | .275 | 035c | 105  | 067  | 096  | 059  | .178 | .267 | .009 |
| <i>BrGL3</i>    | Bra | 1.5 | 0.10 | 0.3 | 0.20 | 0.09 | 0.07 | 0.24 | 0.12 | 0.73 | 0.37 | 0.03 | 0.45 |
|                 | 025 | 75± | 3±0. | 49± | 5±0  | 1±0. | 4±0. | 4±0. | 4±0. | 7±0. | 4±0  | 9±0  | 8±0  |
|                 | 508 | 0.3 | 016  | 0.0 | .003 | 015c | 019  | 000  | 044  | 174  | .015 | .005 | .377 |
|                 | 66a | cd  | 06c  | cd  | d    | d    | cd   | cd   | b    | cd   | d    | bc   |      |

**WD40  
regulatory  
genes**

|               |     |     |      |     |      |      |      |      |      |      |      |      |      |
|---------------|-----|-----|------|-----|------|------|------|------|------|------|------|------|------|
| <i>BrTTG1</i> | Bra | 0.4 | 0.44 | 0.3 | 0.95 | 0.10 | 0.40 | 2.82 | 0.54 | 0.11 | 0.34 | 0.11 | 1.31 |
|               | 009 | 19± | 2±0. | 86± | 1±0  | 5±0. | 3±0. | 5±2. | 2±0. | 6±0. | 0±0  | 4±0  | 3±0  |
|               | 770 | 0.0 | 101  | 0.0 | .195 | 014b | 066  | 582  | 000  | 034  | .021 | .012 | .000 |
|               | 38b | b   | 56b  | b   |      |      | b    | a    | b    | b    | b    | b    | ab   |

**Negative  
regulators  
Single-Repeat  
R3 MYB**

**regulatory  
genes**

|                             |                   |                   |                     |                          |                     |                      |                     |                     |                     |                     |                     |                     |                     |
|-----------------------------|-------------------|-------------------|---------------------|--------------------------|---------------------|----------------------|---------------------|---------------------|---------------------|---------------------|---------------------|---------------------|---------------------|
| <i>BrCPC</i><br><i>1</i>    | Bra<br>004<br>539 | 0.4<br>13±<br>0.0 | 0.49<br>1±0.<br>155 | 0.2<br>76±<br>0.0        | 0.35<br>7±0<br>.024 | 0.20<br>5±0.<br>026d | 0.17<br>2±0.<br>029 | 0.11<br>4±0.<br>024 | 0.85<br>8±0.<br>367 | 0.18<br>4±0.<br>032 | 0.09<br>8±0<br>.033 | 0.08<br>7±0<br>.041 | 0.04<br>4±0<br>.009 |
|                             |                   | 15b<br>c          | b                   | 00c<br>def               | cde                 | ef                   | def                 | ef                  | a                   | def                 | ef                  | ef                  | ef                  |
|                             |                   | 1.1<br>46±<br>0.0 | 1.67<br>0±0.<br>000 | 0.4<br>58±<br>0.0        | 1.41<br>7±0<br>.252 | 0.54<br>2±0.<br>147d | 0.47<br>5±0.<br>076 | 0.35<br>8±0.<br>130 | 2.08<br>1±0.<br>536 | 0.38<br>7±0.<br>087 | 0.16<br>0±0<br>.106 | 0.13<br>5±0<br>.023 | 0.20<br>6±0<br>.011 |
| <i>BrMYB</i><br><i>L2.1</i> | Bra<br>016<br>164 | 0.0<br>23±<br>0.0 | 0.37<br>6±0.<br>040 | 0.1<br>86±<br>0.0        | 0.32<br>7±0<br>.032 | 0.01<br>9±0.<br>003c | 0.01<br>6±0.<br>003 | 0.03<br>3±0.<br>000 | 0.30<br>0±0.<br>112 | 0.04<br>2±0.<br>020 | 0.01<br>0±0<br>.002 | 0.00<br>1±0<br>.000 | 0.00<br>8±0<br>.000 |
|                             |                   | 01c               | a                   | 11b                      | a                   | c                    | c                   | a                   | c                   | c                   | c                   | c                   | c                   |
|                             |                   | 0.3<br>20±<br>0.1 | 5.67<br>8±0.<br>375 | 25.<br>476<br>±4.<br>231 | 10.9<br>60±<br>2.65 | 0.00<br>8±0.<br>000e | 1.25<br>9±0.<br>193 | 3.73<br>1±1.<br>113 | 12.9<br>94±<br>0.18 | 0.08<br>0±0.<br>016 | 0.67<br>9±0<br>.000 | 1.53<br>2±0<br>.410 | 31.8<br>75±<br>3.73 |
| <i>BrMYB</i><br><i>L2.2</i> | Bra<br>007<br>957 | 0.3<br>20±<br>0.1 | 5.67<br>8±0.<br>375 | 25.<br>476<br>±4.<br>231 | 10.9<br>60±<br>2.65 | 0.00<br>8±0.<br>000e | 1.25<br>9±0.<br>193 | 3.73<br>1±1.<br>113 | 12.9<br>94±<br>0.18 | 0.08<br>0±0.<br>016 | 0.67<br>9±0<br>.000 | 1.53<br>2±0<br>.410 | 31.8<br>75±<br>3.73 |
|                             |                   | 28e               | d                   | b                        | 4c                  | e                    | de                  | 4c                  | e                   | e                   | e                   | e                   | 4a                  |

**LATERAL  
ORGAN  
BOUNDARY  
DOMAIN (LBD)  
genes**

|                             |                   |                   |                     |                   |                     |                      |                     |                     |                     |                     |                     |                     |                     |
|-----------------------------|-------------------|-------------------|---------------------|-------------------|---------------------|----------------------|---------------------|---------------------|---------------------|---------------------|---------------------|---------------------|---------------------|
| <i>BrLBD</i><br><i>37.1</i> | Bra<br>012<br>164 | 0.4<br>55±<br>0.0 | 4.12<br>9±1.<br>448 | 1.4<br>24±<br>0.2 | 4.42<br>2±0<br>.824 | 0.52<br>1±0.<br>144c | 1.04<br>6±0.<br>000 | 1.64<br>4±0.<br>075 | 5.11<br>8±1.<br>133 | 0.03<br>5±0.<br>003 | 0.12<br>4±0<br>.029 | 0.20<br>0±0<br>.075 | 2.00<br>3±0<br>.124 |
|                             |                   | 90c<br>de         | a                   | 57b<br>cd         | a                   | de                   | bcd<br>e            | bc                  | a                   | e                   | de                  | de                  | b                   |
|                             |                   | 0.6<br>70±<br>0.1 | 0.74<br>6±0.<br>154 | 4.5<br>43±<br>2.8 | 4.97<br>6±0<br>.355 | 0.06<br>5±0.<br>023c | 0.20<br>8±0.<br>093 | 0.13<br>6±0.<br>021 | 2.28<br>0±0.<br>671 | 0.02<br>5±0.<br>005 | 0.82<br>0±0<br>.202 | 0.14<br>2±0<br>.023 | 0.92<br>4±0<br>.180 |
| <i>BrLBD</i><br><i>37.2</i> | Bra<br>031<br>833 | 0.6<br>70±<br>0.1 | 0.74<br>6±0.<br>154 | 4.5<br>43±<br>2.8 | 4.97<br>6±0<br>.355 | 0.06<br>5±0.<br>023c | 0.20<br>8±0.<br>093 | 0.13<br>6±0.<br>021 | 2.28<br>0±0.<br>671 | 0.02<br>5±0.<br>005 | 0.82<br>0±0<br>.202 | 0.14<br>2±0<br>.023 | 0.92<br>4±0<br>.180 |
|                             |                   | 44b<br>c          | bc                  | 77a               | a                   | c                    | c                   | b                   | c                   | bc                  | c                   | bc                  |                     |
|                             |                   | 2.0<br>49±<br>0.4 | 7.29<br>7±2.<br>113 | 5.1<br>08±<br>1.3 | 6.91<br>1±0<br>.140 | 0.06<br>2±0.<br>003d | 0.24<br>8±0.<br>012 | 0.66<br>0±0.<br>005 | 6.13<br>5±1.<br>087 | 0.06<br>8±0.<br>012 | 0.34<br>0±0<br>.129 | 0.26<br>4±0<br>.109 | 0.82<br>9±0<br>.080 |
| <i>BrLBD</i><br><i>37.3</i> | Bra<br>037<br>847 | 2.0<br>49±<br>0.4 | 7.29<br>7±2.<br>113 | 5.1<br>08±<br>1.3 | 6.91<br>1±0<br>.140 | 0.06<br>2±0.<br>003d | 0.24<br>8±0.<br>012 | 0.66<br>0±0.<br>005 | 6.13<br>5±1.<br>087 | 0.06<br>8±0.<br>012 | 0.34<br>0±0<br>.129 | 0.26<br>4±0<br>.109 | 0.82<br>9±0<br>.080 |
|                             |                   | 19c               | a                   | 07b               | a                   | cd                   | cd                  | ab                  | d                   | cd                  | cd                  | cd                  |                     |
|                             |                   | 0.3<br>11±<br>0.1 | 3.07<br>7±0.<br>388 | 0.5<br>03±<br>0.0 | 0.91<br>4±0<br>.159 | 0.45<br>2±0.<br>075d | 0.38<br>9±0.<br>068 | 0.35<br>6±0.<br>096 | 1.17<br>4±0.<br>081 | 0.14<br>3±0.<br>028 | 0.25<br>0±0<br>.078 | 0.32<br>4±0<br>.045 | 1.92<br>6±0<br>.452 |
| <i>BrLBD</i><br><i>38.1</i> | Bra<br>036<br>040 | 0.3<br>11±<br>0.1 | 3.07<br>7±0.<br>388 | 0.5<br>03±<br>0.0 | 0.91<br>4±0<br>.159 | 0.45<br>2±0.<br>075d | 0.38<br>9±0.<br>068 | 0.35<br>6±0.<br>096 | 1.17<br>4±0.<br>081 | 0.14<br>3±0.<br>028 | 0.25<br>0±0<br>.078 | 0.32<br>4±0<br>.045 | 1.92<br>6±0<br>.452 |
|                             |                   | 15d               | a                   | 32d               | c                   | d                    | d                   | c                   | d                   | d                   | d                   | d                   | b                   |
|                             |                   | 2.2<br>75±<br>1.2 | 2.69<br>4±0.<br>010 | 0.1<br>84±<br>0.0 | 0.29<br>3±0<br>.017 | 0.40<br>6±0.<br>019b | 0.81<br>0±0.<br>264 | 0.74<br>5±0.<br>103 | 0.29<br>9±0.<br>074 | 0.37<br>2±0.<br>021 | 0.25<br>3±0<br>.023 | 0.11<br>6±0<br>.002 | 0.05<br>0±0<br>.013 |
| <i>BrLBD</i><br><i>38.2</i> | Bra<br>012<br>913 | 2.2<br>75±<br>1.2 | 2.69<br>4±0.<br>010 | 0.1<br>84±<br>0.0 | 0.29<br>3±0<br>.017 | 0.40<br>6±0.<br>019b | 0.81<br>0±0.<br>264 | 0.74<br>5±0.<br>103 | 0.29<br>9±0.<br>074 | 0.37<br>2±0.<br>021 | 0.25<br>3±0<br>.023 | 0.11<br>6±0<br>.002 | 0.05<br>0±0<br>.013 |
|                             |                   | 19c               | a                   | 32d               | c                   | d                    | d                   | c                   | d                   | d                   | d                   | d                   | b                   |

|                        |                   |     |      |     |      |      |      |      |      |      |      |      |      |
|------------------------|-------------------|-----|------|-----|------|------|------|------|------|------|------|------|------|
|                        |                   | 59a | a    | 05b | b    |      | b    | b    | b    | b    | b    | b    | b    |
| <i>BrLBD</i><br>39.1   | Bra<br>011<br>772 | 5.1 | 112. | 50. | 94.5 | 21.1 | 8.50 | 132. | 147. | 1.35 | 11.5 | 4.93 | 50.5 |
|                        |                   | 21± | 654  | 916 | 72±  | 09±  | 1±2. | 983  | 287  | 4±0. | 42±  | 5±0  | 00±  |
|                        |                   | 1.2 | ±14. | ±2. | 12.9 | 0.68 | 475  | ±37. | ±47. | 193  | 3.12 | .271 | 17.3 |
|                        |                   | 51d | 678  | 621 | 49b  | 3cd  | cd   | ab   | a    | d    | 5cd  | d    | 71c  |
| <i>BrLBD</i><br>39.2   | Bra<br>017<br>831 | 0.4 | 4.62 | 1.4 | 0.24 | 1.16 | 0.24 | 2.00 | 0.24 | 0.10 | 0.17 | 0.06 | 0.04 |
|                        |                   | 32± | 2±0. | 33± | 4±0  | 5±0. | 1±0. | 0±0. | 6±0. | 6±0. | 9±0  | 3±0  | 7±0  |
|                        |                   | 0.0 | 420  | 0.0 | .059 | 5±0. | 107  | 037  | 054  | 030  | .022 | .013 | .009 |
|                        |                   | 65d | a    | 87c | de   | 086c | de   | b    | de   | e    | de   | e    | e    |
| <b>Transport genes</b> |                   |     |      |     |      |      |      |      |      |      |      |      |      |
| <i>BrGST1</i>          | Bra<br>008<br>570 | 0.4 | 1.64 | 0.8 | 1.51 | 193. | 3.73 | 11.5 | 4.58 | 659. | 68.9 | 78.8 | 35.5 |
|                        |                   | 83± | 5±0. | 74± | 7±0  | 324  | 9±0. | 78±  | 3±1. | 127  | 72±  | 09±  | 28±  |
|                        |                   | 0.0 | 020  | 0.7 | .458 | ±59. | 671  | 0.13 | 806  | ±11  | 16.4 | 5.63 | 3.70 |
|                        |                   | 58c | c    | 75c | c    | 890b | c    | 3c   | c    | 1.83 | 87c  | 2c   | 8c   |
| <i>BrGST2</i>          | Bra<br>023<br>602 | 0.1 | 0.15 | 0.0 | 0.05 | 12.7 | 0.08 | 0.04 | 0.12 | 17.0 | 1.29 | 1.02 | 0.31 |
|                        |                   | 16± | 5±0. | 14± | 2±0  | 80±  | 2±0. | 1±0. | 4±0. | 36±  | 1±0  | 1±0  | 4±0  |
|                        |                   | 0.0 | 035  | 0.0 | .016 | 2.32 | 020  | 006  | 028  | 1.58 | .404 | .169 | .069 |
|                        |                   | 02c | c    | 07c | c    | 3b   | c    | c    | c    | 6a   | c    | c    | c    |
